# Supplementary material
Source: MDPI journal article supplement (https://www.mdpi.com/2304-6740/5/4/72)
Supplement: s1 [file s1]

Archive with 6 entries (6 files):
- NAKA171.CIF
- checkcif_naka63.pdf
- checkcif_naka104.pdf
- checkcif_naka171.pdf
- NAKA63.CIF
- NAKA104.CIF
