# Supplementary material
Source: MDPI journal article supplement (https://www.mdpi.com/2304-6740/5/4/72)
Supplement: s1 [file s1 › NAKA63.CIF]

 
data_naka63 
 
_audit_creation_method            SHELXL-97 
_chemical_name_systematic 
; 
 'C56 H46 P2 Pt Si, C7 H8' 
; 
_chemical_name_common             ? 
_chemical_melting_point           ? 
_chemical_formula_moiety          'C56 H46 P2 Pt Si, C7 H8' 
_chemical_formula_sum 
 'C63 H54 P2 Pt Si' 
_chemical_formula_weight          1096.18 
 
loop_ 
 _atom_type_symbol 
 _atom_type_description 
 _atom_type_scat_dispersion_real 
 _atom_type_scat_dispersion_imag 
 _atom_type_scat_source 
 'C'  'C'   0.0033   0.0016 
 'International Tables Vol C Tables 4.2.6.8 and 6.1.1.4' 
 'H'  'H'   0.0000   0.0000 
 'International Tables Vol C Tables 4.2.6.8 and 6.1.1.4' 
 'Si'  'Si'   0.0817   0.0704 
 'International Tables Vol C Tables 4.2.6.8 and 6.1.1.4' 
 'P'  'P'   0.1023   0.0942 
 'International Tables Vol C Tables 4.2.6.8 and 6.1.1.4' 
 'Pt'  'Pt'  -1.7033   8.3905 
 'International Tables Vol C Tables 4.2.6.8 and 6.1.1.4' 
 
_symmetry_cell_setting            'triclinic'
_symmetry_space_group_name_H-M    'P -1'
_symmetry_space_group_name_Hall       '-P 1'
_symmetry_Int_Tables_number            2
 
loop_ 
 _symmetry_equiv_pos_as_xyz 
 'x, y, z' 
 '-x, -y, -z' 
 
_cell_length_a                    12.7971(6) 
_cell_length_b                    13.4847(6) 
_cell_length_c                    14.8861(7) 
_cell_angle_alpha                 99.2790(10) 
_cell_angle_beta                  102.5530(10) 
_cell_angle_gamma                 90.3020(10) 
_cell_volume                      2472.4(2) 
_cell_formula_units_Z             2 
_cell_measurement_temperature     103(2) 
_cell_measurement_reflns_used     6289
_cell_measurement_theta_min       2.21 
_cell_measurement_theta_max       27.75 
 
_exptl_crystal_description        'prism' 
_exptl_crystal_colour             'colorless'
_exptl_crystal_size_max           0.35 
_exptl_crystal_size_mid           0.30 
_exptl_crystal_size_min           0.30 
_exptl_crystal_density_meas       'not measured' 
_exptl_crystal_density_diffrn     1.472 
_exptl_crystal_density_method     'not measured' 
_exptl_crystal_F_000              1108 
_exptl_absorpt_coefficient_mu     2.968 
_exptl_absorpt_correction_type    'empirical' 
_exptl_absorpt_correction_T_min   0.4231 
_exptl_absorpt_correction_T_max   0.4697 
_exptl_absorpt_process_details    'SADABS (Sheldrick, 1997)' 
 
_exptl_special_details 
; 
 ? 
; 
 
_diffrn_ambient_temperature       103(2) 
_diffrn_radiation_wavelength      0.71073 
_diffrn_radiation_type            MoK\a 
_diffrn_radiation_source          'fine-focus sealed tube' 
_diffrn_radiation_monochromator   graphite 
_diffrn_measurement_device_type   'CCD area detector'
_diffrn_measurement_method        'phi and omega scans'  
_diffrn_detector_area_resol_mean  ? 
_diffrn_standards_number          ? 
_diffrn_standards_interval_count  ? 
_diffrn_standards_interval_time   ? 
_diffrn_standards_decay_%         ? 
_diffrn_reflns_number             17804 
_diffrn_reflns_av_R_equivalents   0.0218 
_diffrn_reflns_av_sigmaI/netI     0.0439 
_diffrn_reflns_limit_h_min        -11 
_diffrn_reflns_limit_h_max        16 
_diffrn_reflns_limit_k_min        -15 
_diffrn_reflns_limit_k_max        17 
_diffrn_reflns_limit_l_min        -19 
_diffrn_reflns_limit_l_max        18 
_diffrn_reflns_theta_min          1.42 
_diffrn_reflns_theta_max          27.86 
_reflns_number_total              11639 
_reflns_number_gt                 10423 
_reflns_threshold_expression      >2sigma(I) 
 
_computing_data_collection        'Bruker SMART'
_computing_cell_refinement        'Bruker SAINT'
_computing_data_reduction         'Bruker SAINT' 
_computing_structure_solution     'SHELXS-97 (Sheldrick, 1990)' 
_computing_structure_refinement   'SHELXL-97 (Sheldrick, 1997)' 
_computing_molecular_graphics 'Yadokari-XG 2009 (Wakita, Nemoto et al., 2009)'
_computing_publication_material 'Yadokari-XG 2009 (Wakita, Nemoto et al., 2009)'
_publ_section_references
;
Wakita, K. (2001). Yadokari-XG. Software for Crystal Structure Analyses.
Release of Software (Yadokari-XG 2009) for Crystal Structure Analyses,
Kabuto, C., Akine, S., Nemoto, T. & Kwon, E. (2009). J. Cryst. Soc. Jpn.,51,
218-224.
; 
 
_refine_special_details 
; 
 Refinement of F^2^ against ALL reflections.  The weighted R-factor wR and 
 goodness of fit S are based on F^2^, conventional R-factors R are based 
 on F, with F set to zero for negative F^2^. The threshold expression of 
 F^2^ > 2sigma(F^2^) is used only for calculating R-factors(gt) etc. and is 
 not relevant to the choice of reflections for refinement.  R-factors based 
 on F^2^ are statistically about twice as large as those based on F, and R- 
 factors based on ALL data will be even larger. 
; 
 
_refine_ls_structure_factor_coef  Fsqd  
_refine_ls_matrix_type            full 
_refine_ls_weighting_scheme       calc  
_refine_ls_weighting_details 
 'calc w=1/[\s^2^(Fo^2^)+(0.0428P)^2^+0.0000P] where P=(Fo^2^+2Fc^2^)/3' 
_atom_sites_solution_primary      direct 
_atom_sites_solution_secondary    difmap 
_atom_sites_solution_hydrogens    geom 
_refine_ls_hydrogen_treatment     mixed 
_refine_ls_extinction_method      none 
_refine_ls_extinction_coef        ? 
_refine_ls_number_reflns          11639 
_refine_ls_number_parameters      617 
_refine_ls_number_restraints      0 
_refine_ls_R_factor_all           0.0371 
_refine_ls_R_factor_gt            0.0310 
_refine_ls_wR_factor_ref          0.0743 
_refine_ls_wR_factor_gt           0.0718 
_refine_ls_goodness_of_fit_ref    1.025 
_refine_ls_restrained_S_all       1.025 
_refine_ls_shift/su_max           0.001 
_refine_ls_shift/su_mean          0.000 
 
loop_ 
 _atom_site_label 
 _atom_site_type_symbol 
 _atom_site_fract_x 
 _atom_site_fract_y 
 _atom_site_fract_z 
 _atom_site_U_iso_or_equiv 
 _atom_site_adp_type 
 _atom_site_occupancy 
 _atom_site_symmetry_multiplicity 
 _atom_site_calc_flag 
 _atom_site_refinement_flags 
 _atom_site_disorder_assembly 
 _atom_site_disorder_group 
Pt1 Pt 0.263684(9) 0.299632(8) 0.133151(8) 0.01327(4) Uani 1 1 d . . . 
H1 H 0.202(3) 0.237(3) 0.036(3) 0.049(13) Uiso 1 1 d . . . 
Si1 Si 0.39293(7) 0.30791(6) 0.04412(6) 0.01557(17) Uani 1 1 d . . . 
H2 H 0.494(3) 0.292(3) 0.092(3) 0.032(11) Uiso 1 1 d . . . 
H3 H 0.399(3) 0.397(3) 0.016(3) 0.026(10) Uiso 1 1 d . . . 
C1 C 0.3693(2) 0.2132(2) -0.0699(2) 0.0140(6) Uani 1 1 d . . . 
C2 C 0.4570(2) 0.2108(2) -0.1278(2) 0.0169(6) Uani 1 1 d . . . 
C3 C 0.5508(2) 0.2698(2) -0.1061(2) 0.0183(6) Uani 1 1 d . . . 
H4 H 0.5663 0.3195 -0.0515 0.022 Uiso 1 1 calc R . . 
C4 C 0.6224(3) 0.2557(3) -0.1651(2) 0.0234(7) Uani 1 1 d . . . 
H5 H 0.6866 0.2965 -0.1505 0.028 Uiso 1 1 calc R . . 
C5 C 0.6013(3) 0.1831(3) -0.2446(2) 0.0246(7) Uani 1 1 d . . . 
H6 H 0.6510 0.1739 -0.2840 0.030 Uiso 1 1 calc R . . 
C6 C 0.5072(3) 0.1237(2) -0.2667(2) 0.0217(7) Uani 1 1 d . . . 
H7 H 0.4926 0.0735 -0.3209 0.026 Uiso 1 1 calc R . . 
C7 C 0.4350(3) 0.1383(2) -0.2092(2) 0.0177(6) Uani 1 1 d . . . 
C8 C 0.2668(2) 0.2300(2) -0.1417(2) 0.0163(6) Uani 1 1 d . . . 
C9 C 0.2004(2) 0.3104(2) -0.1341(2) 0.0184(6) Uani 1 1 d . . . 
H8 H 0.2149 0.3603 -0.0796 0.022 Uiso 1 1 calc R . . 
C10 C 0.1124(3) 0.3183(3) -0.2061(2) 0.0231(7) Uani 1 1 d . . . 
H9 H 0.0676 0.3740 -0.2010 0.028 Uiso 1 1 calc R . . 
C11 C 0.0898(3) 0.2440(3) -0.2860(2) 0.0228(7) Uani 1 1 d . . . 
H10 H 0.0285 0.2481 -0.3343 0.027 Uiso 1 1 calc R . . 
C12 C 0.1576(3) 0.1643(2) -0.2945(2) 0.0216(7) Uani 1 1 d . . . 
H11 H 0.1434 0.1145 -0.3491 0.026 Uiso 1 1 calc R . . 
C13 C 0.2456(2) 0.1578(2) -0.2231(2) 0.0181(6) Uani 1 1 d . . . 
C14 C 0.3591(2) 0.1029(2) -0.0551(2) 0.0148(6) Uani 1 1 d . . . 
C15 C 0.3739(2) 0.0698(2) 0.0298(2) 0.0183(6) Uani 1 1 d . . . 
H12 H 0.3903 0.1169 0.0862 0.022 Uiso 1 1 calc R . . 
C16 C 0.3649(2) -0.0324(2) 0.0327(2) 0.0213(7) Uani 1 1 d . . . 
H13 H 0.3746 -0.0546 0.0912 0.026 Uiso 1 1 calc R . . 
C17 C 0.3421(3) -0.1019(2) -0.0488(3) 0.0232(7) Uani 1 1 d . . . 
H14 H 0.3352 -0.1716 -0.0463 0.028 Uiso 1 1 calc R . . 
C18 C 0.3290(3) -0.0693(2) -0.1348(2) 0.0220(7) Uani 1 1 d . . . 
H15 H 0.3144 -0.1167 -0.1911 0.026 Uiso 1 1 calc R . . 
C19 C 0.3375(2) 0.0323(2) -0.1373(2) 0.0170(6) Uani 1 1 d . . . 
C20 C 0.3294(2) 0.0791(2) -0.2247(2) 0.0188(6) Uani 1 1 d . . . 
H16 H 0.3144 0.0284 -0.2833 0.023 Uiso 1 1 calc R . . 
P1 P 0.36348(6) 0.38976(6) 0.26897(5) 0.01402(15) Uani 1 1 d . . . 
C21 C 0.3081(2) 0.5096(2) 0.3069(2) 0.0159(6) Uani 1 1 d . . . 
C22 C 0.2177(2) 0.5405(2) 0.2501(2) 0.0185(6) Uani 1 1 d . . . 
H17 H 0.1842 0.4982 0.1937 0.022 Uiso 1 1 calc R . . 
C23 C 0.1758(3) 0.6333(2) 0.2753(2) 0.0229(7) Uani 1 1 d . . . 
H18 H 0.1147 0.6548 0.2354 0.027 Uiso 1 1 calc R . . 
C24 C 0.2231(3) 0.6942(2) 0.3583(2) 0.0239(7) Uani 1 1 d . . . 
H19 H 0.1926 0.7562 0.3769 0.029 Uiso 1 1 calc R . . 
C25 C 0.3147(3) 0.6649(2) 0.4143(2) 0.0241(7) Uani 1 1 d . . . 
H20 H 0.3475 0.7071 0.4711 0.029 Uiso 1 1 calc R . . 
C26 C 0.3586(3) 0.5742(2) 0.3879(2) 0.0204(7) Uani 1 1 d . . . 
H21 H 0.4235 0.5559 0.4250 0.025 Uiso 1 1 calc R . . 
C27 C 0.3806(2) 0.3177(2) 0.3644(2) 0.0160(6) Uani 1 1 d . . . 
C28 C 0.3716(2) 0.3537(2) 0.4549(2) 0.0189(6) Uani 1 1 d . . . 
H22 H 0.3528 0.4213 0.4709 0.023 Uiso 1 1 calc R . . 
C29 C 0.3898(3) 0.2922(3) 0.5220(2) 0.0247(7) Uani 1 1 d . . . 
H23 H 0.3839 0.3179 0.5839 0.030 Uiso 1 1 calc R . . 
C30 C 0.4164(3) 0.1936(3) 0.4998(2) 0.0258(7) Uani 1 1 d . . . 
H24 H 0.4294 0.1518 0.5463 0.031 Uiso 1 1 calc R . . 
C31 C 0.4240(3) 0.1558(3) 0.4092(2) 0.0232(7) Uani 1 1 d . . . 
H25 H 0.4416 0.0878 0.3936 0.028 Uiso 1 1 calc R . . 
C32 C 0.4059(2) 0.2170(2) 0.3413(2) 0.0188(6) Uani 1 1 d . . . 
H26 H 0.4106 0.1907 0.2792 0.023 Uiso 1 1 calc R . . 
C33 C 0.5016(2) 0.4335(2) 0.2763(2) 0.0165(6) Uani 1 1 d . . . 
C34 C 0.5168(3) 0.5057(2) 0.2226(2) 0.0212(7) Uani 1 1 d . . . 
H27 H 0.4568 0.5280 0.1822 0.025 Uiso 1 1 calc R . . 
C35 C 0.6180(3) 0.5455(3) 0.2273(2) 0.0256(7) Uani 1 1 d . . . 
H28 H 0.6270 0.5946 0.1902 0.031 Uiso 1 1 calc R . . 
C36 C 0.7063(3) 0.5135(3) 0.2861(3) 0.0268(8) Uani 1 1 d . . . 
H29 H 0.7759 0.5409 0.2896 0.032 Uiso 1 1 calc R . . 
C37 C 0.6923(3) 0.4415(3) 0.3394(3) 0.0296(8) Uani 1 1 d . . . 
H30 H 0.7526 0.4191 0.3795 0.035 Uiso 1 1 calc R . . 
C38 C 0.5903(3) 0.4018(3) 0.3346(2) 0.0242(7) Uani 1 1 d . . . 
H31 H 0.5813 0.3525 0.3716 0.029 Uiso 1 1 calc R . . 
P2 P 0.10734(6) 0.25920(6) 0.17923(5) 0.01468(15) Uani 1 1 d . . . 
C39 C -0.0102(2) 0.3188(2) 0.1208(2) 0.0181(6) Uani 1 1 d . . . 
C40 C -0.1050(3) 0.3273(3) 0.1536(3) 0.0260(7) Uani 1 1 d . . . 
H32 H -0.1094 0.3021 0.2088 0.031 Uiso 1 1 calc R . . 
C41 C -0.1924(3) 0.3723(3) 0.1058(3) 0.0320(8) Uani 1 1 d . . . 
H33 H -0.2568 0.3766 0.1279 0.038 Uiso 1 1 calc R . . 
C42 C -0.1867(3) 0.4108(3) 0.0262(3) 0.0323(9) Uani 1 1 d . . . 
H34 H -0.2463 0.4428 -0.0055 0.039 Uiso 1 1 calc R . . 
C43 C -0.0935(3) 0.4026(3) -0.0069(3) 0.0308(8) Uani 1 1 d . . . 
H35 H -0.0895 0.4282 -0.0619 0.037 Uiso 1 1 calc R . . 
C44 C -0.0058(3) 0.3569(2) 0.0399(2) 0.0227(7) Uani 1 1 d . . . 
H36 H 0.0577 0.3516 0.0165 0.027 Uiso 1 1 calc R . . 
C45 C 0.0731(2) 0.1243(2) 0.1517(2) 0.0172(6) Uani 1 1 d . . . 
C46 C -0.0323(3) 0.0854(3) 0.1280(3) 0.0243(7) Uani 1 1 d . . . 
H37 H -0.0899 0.1299 0.1237 0.029 Uiso 1 1 calc R . . 
C47 C -0.0537(3) -0.0176(3) 0.1106(3) 0.0296(8) Uani 1 1 d . . . 
H38 H -0.1258 -0.0435 0.0935 0.036 Uiso 1 1 calc R . . 
C48 C 0.0291(3) -0.0826(3) 0.1180(3) 0.0300(8) Uani 1 1 d . . . 
H39 H 0.0142 -0.1531 0.1077 0.036 Uiso 1 1 calc R . . 
C49 C 0.1341(3) -0.0452(3) 0.1406(3) 0.0297(8) Uani 1 1 d . . . 
H40 H 0.1913 -0.0901 0.1450 0.036 Uiso 1 1 calc R . . 
C50 C 0.1560(3) 0.0577(3) 0.1566(2) 0.0235(7) Uani 1 1 d . . . 
H41 H 0.2282 0.0830 0.1710 0.028 Uiso 1 1 calc R . . 
C51 C 0.1012(2) 0.2894(2) 0.3021(2) 0.0180(6) Uani 1 1 d . . . 
C52 C 0.1268(3) 0.2192(3) 0.3618(2) 0.0217(7) Uani 1 1 d . . . 
H42 H 0.1412 0.1524 0.3371 0.026 Uiso 1 1 calc R . . 
C53 C 0.1316(3) 0.2454(3) 0.4570(2) 0.0287(8) Uani 1 1 d . . . 
H43 H 0.1495 0.1969 0.4970 0.034 Uiso 1 1 calc R . . 
C54 C 0.1102(3) 0.3424(3) 0.4932(3) 0.0331(9) Uani 1 1 d . . . 
H44 H 0.1129 0.3604 0.5581 0.040 Uiso 1 1 calc R . . 
C55 C 0.0850(3) 0.4127(3) 0.4353(3) 0.0304(8) Uani 1 1 d . . . 
H45 H 0.0706 0.4792 0.4605 0.036 Uiso 1 1 calc R . . 
C56 C 0.0806(3) 0.3873(3) 0.3403(2) 0.0237(7) Uani 1 1 d . . . 
H46 H 0.0634 0.4365 0.3011 0.028 Uiso 1 1 calc R . . 
C57 C 0.8438(3) 0.1810(4) 0.3676(3) 0.0410(10) Uani 1 1 d . . . 
H47 H 0.8988 0.2343 0.3967 0.061 Uiso 1 1 calc R . . 
H48 H 0.7788 0.2107 0.3368 0.061 Uiso 1 1 calc R . . 
H49 H 0.8704 0.1336 0.3214 0.061 Uiso 1 1 calc R . . 
C58 C 0.8185(3) 0.1263(3) 0.4415(3) 0.0265(7) Uani 1 1 d . . . 
C59 C 0.7126(3) 0.1085(2) 0.4468(2) 0.0253(7) Uani 1 1 d . . . 
H50 H 0.6556 0.1298 0.4026 0.030 Uiso 1 1 calc R . . 
C60 C 0.6900(3) 0.0601(3) 0.5159(3) 0.0300(8) Uani 1 1 d . . . 
H51 H 0.6175 0.0479 0.5181 0.036 Uiso 1 1 calc R . . 
C61 C 0.7713(3) 0.0290(3) 0.5818(3) 0.0323(9) Uani 1 1 d . . . 
H52 H 0.7551 -0.0031 0.6297 0.039 Uiso 1 1 calc R . . 
C62 C 0.8774(3) 0.0456(3) 0.5769(3) 0.0306(8) Uani 1 1 d . . . 
H53 H 0.9342 0.0241 0.6211 0.037 Uiso 1 1 calc R . . 
C63 C 0.8996(3) 0.0935(3) 0.5074(3) 0.0276(8) Uani 1 1 d . . . 
H54 H 0.9721 0.1043 0.5045 0.033 Uiso 1 1 calc R . . 
 
loop_ 
 _atom_site_aniso_label 
 _atom_site_aniso_U_11 
 _atom_site_aniso_U_22 
 _atom_site_aniso_U_33 
 _atom_site_aniso_U_23 
 _atom_site_aniso_U_13 
 _atom_site_aniso_U_12 
Pt1 0.01451(6) 0.01298(6) 0.01167(6) 0.00026(4) 0.00283(4) -0.00039(4) 
Si1 0.0163(4) 0.0158(4) 0.0143(4) 0.0002(3) 0.0043(3) -0.0020(3) 
C1 0.0147(14) 0.0144(14) 0.0129(14) 0.0021(11) 0.0032(11) 0.0017(11) 
C2 0.0175(15) 0.0207(15) 0.0139(15) 0.0052(12) 0.0045(12) 0.0026(12) 
C3 0.0221(16) 0.0156(14) 0.0177(16) 0.0049(12) 0.0041(12) 0.0012(12) 
C4 0.0203(16) 0.0239(17) 0.0288(19) 0.0100(14) 0.0073(13) 0.0016(13) 
C5 0.0278(18) 0.0280(17) 0.0240(18) 0.0092(14) 0.0149(14) 0.0101(14) 
C6 0.0279(18) 0.0235(16) 0.0149(15) 0.0038(12) 0.0065(13) 0.0066(13) 
C7 0.0228(16) 0.0156(14) 0.0159(15) 0.0053(12) 0.0045(12) 0.0048(12) 
C8 0.0150(14) 0.0179(14) 0.0175(15) 0.0054(12) 0.0055(12) -0.0020(12) 
C9 0.0194(16) 0.0168(14) 0.0205(16) 0.0034(12) 0.0073(12) -0.0034(12) 
C10 0.0175(16) 0.0256(17) 0.0285(19) 0.0097(14) 0.0062(13) 0.0042(13) 
C11 0.0167(16) 0.0268(17) 0.0249(18) 0.0105(14) -0.0002(13) -0.0012(13) 
C12 0.0211(16) 0.0243(16) 0.0171(16) 0.0024(13) 0.0003(12) -0.0034(13) 
C13 0.0190(15) 0.0180(15) 0.0177(16) 0.0037(12) 0.0046(12) -0.0019(12) 
C14 0.0112(14) 0.0132(13) 0.0191(15) 0.0006(11) 0.0031(11) -0.0013(11) 
C15 0.0161(15) 0.0210(15) 0.0175(16) 0.0017(12) 0.0044(12) 0.0020(12) 
C16 0.0173(16) 0.0247(16) 0.0251(17) 0.0104(14) 0.0069(13) 0.0034(13) 
C17 0.0191(16) 0.0155(15) 0.035(2) 0.0063(14) 0.0043(14) 0.0007(12) 
C18 0.0199(16) 0.0191(15) 0.0231(17) -0.0011(13) -0.0001(13) -0.0010(13) 
C19 0.0130(14) 0.0197(15) 0.0173(15) 0.0017(12) 0.0022(11) 0.0003(12) 
C20 0.0219(16) 0.0177(15) 0.0150(15) 0.0000(12) 0.0020(12) 0.0020(12) 
P1 0.0153(4) 0.0127(3) 0.0131(4) 0.0012(3) 0.0019(3) 0.0004(3) 
C21 0.0190(15) 0.0136(14) 0.0154(15) 0.0022(11) 0.0044(12) -0.0003(11) 
C22 0.0209(16) 0.0177(15) 0.0152(15) 0.0006(12) 0.0020(12) -0.0005(12) 
C23 0.0183(16) 0.0218(16) 0.0278(18) 0.0038(14) 0.0038(13) 0.0033(13) 
C24 0.0274(18) 0.0147(15) 0.0302(19) -0.0005(13) 0.0108(15) 0.0052(13) 
C25 0.0328(19) 0.0173(15) 0.0196(17) -0.0027(13) 0.0043(14) 0.0014(14) 
C26 0.0214(16) 0.0169(15) 0.0212(17) 0.0016(12) 0.0021(13) 0.0014(12) 
C27 0.0137(14) 0.0155(14) 0.0176(15) 0.0029(12) 0.0007(11) -0.0015(11) 
C28 0.0184(16) 0.0186(15) 0.0179(16) 0.0015(12) 0.0013(12) -0.0019(12) 
C29 0.0258(18) 0.0317(18) 0.0154(16) 0.0049(14) 0.0017(13) -0.0039(14) 
C30 0.0257(18) 0.0295(18) 0.0230(18) 0.0138(14) 0.0001(14) -0.0020(14) 
C31 0.0203(17) 0.0216(16) 0.0281(18) 0.0094(14) 0.0026(13) 0.0011(13) 
C32 0.0171(15) 0.0190(15) 0.0196(16) 0.0017(12) 0.0039(12) 0.0003(12) 
C33 0.0174(15) 0.0157(14) 0.0155(15) -0.0012(11) 0.0044(12) -0.0013(12) 
C34 0.0215(16) 0.0204(15) 0.0221(17) 0.0049(13) 0.0048(13) 0.0009(13) 
C35 0.0300(19) 0.0221(16) 0.0262(18) 0.0042(14) 0.0095(14) -0.0056(14) 
C36 0.0222(17) 0.0300(18) 0.0273(19) -0.0021(15) 0.0085(14) -0.0085(14) 
C37 0.0190(17) 0.039(2) 0.030(2) 0.0075(16) 0.0010(14) -0.0013(15) 
C38 0.0218(17) 0.0282(18) 0.0224(17) 0.0077(14) 0.0020(13) -0.0027(14) 
P2 0.0150(4) 0.0156(4) 0.0132(4) 0.0018(3) 0.0031(3) 0.0003(3) 
C39 0.0156(15) 0.0149(14) 0.0209(16) -0.0009(12) 0.0008(12) 0.0024(11) 
C40 0.0226(17) 0.0282(18) 0.0261(18) -0.0001(14) 0.0062(14) 0.0036(14) 
C41 0.0233(18) 0.0297(19) 0.037(2) -0.0064(16) 0.0020(15) 0.0041(15) 
C42 0.0256(19) 0.0213(17) 0.039(2) -0.0051(15) -0.0095(16) 0.0073(14) 
C43 0.034(2) 0.0272(18) 0.0268(19) 0.0075(15) -0.0055(15) 0.0001(15) 
C44 0.0236(17) 0.0227(16) 0.0205(17) 0.0052(13) 0.0010(13) 0.0014(13) 
C45 0.0165(15) 0.0183(15) 0.0171(15) 0.0023(12) 0.0046(12) -0.0019(12) 
C46 0.0192(16) 0.0216(16) 0.0313(19) 0.0022(14) 0.0054(14) -0.0023(13) 
C47 0.0275(19) 0.0258(18) 0.035(2) 0.0022(15) 0.0081(15) -0.0094(15) 
C48 0.039(2) 0.0163(16) 0.036(2) 0.0006(14) 0.0142(17) -0.0045(15) 
C49 0.031(2) 0.0181(16) 0.040(2) 0.0042(15) 0.0076(16) 0.0018(14) 
C50 0.0180(16) 0.0233(16) 0.0278(18) 0.0011(14) 0.0043(13) 0.0000(13) 
C51 0.0156(15) 0.0213(15) 0.0173(16) 0.0016(12) 0.0051(12) -0.0015(12) 
C52 0.0194(16) 0.0269(17) 0.0188(16) 0.0048(13) 0.0036(12) -0.0022(13) 
C53 0.0257(18) 0.040(2) 0.0204(18) 0.0097(15) 0.0017(14) -0.0091(15) 
C54 0.0284(19) 0.052(2) 0.0166(17) -0.0027(16) 0.0073(14) -0.0132(17) 
C55 0.0293(19) 0.0322(19) 0.028(2) -0.0043(15) 0.0099(15) -0.0055(15) 
C56 0.0221(17) 0.0245(17) 0.0249(18) 0.0016(14) 0.0085(13) -0.0019(13) 
C57 0.032(2) 0.062(3) 0.026(2) 0.0012(19) 0.0046(16) -0.004(2) 
C58 0.0234(17) 0.0262(17) 0.0248(18) -0.0085(14) 0.0040(14) -0.0030(14) 
C59 0.0240(17) 0.0213(16) 0.0248(18) -0.0064(13) 0.0005(14) 0.0021(13) 
C60 0.0214(18) 0.0209(17) 0.045(2) -0.0021(16) 0.0078(16) -0.0014(14) 
C61 0.029(2) 0.0185(16) 0.050(3) 0.0091(16) 0.0074(17) -0.0001(14) 
C62 0.0239(18) 0.0179(16) 0.047(2) 0.0052(16) 0.0011(16) 0.0043(14) 
C63 0.0208(17) 0.0224(17) 0.036(2) -0.0054(15) 0.0068(15) 0.0023(13) 
 
_geom_special_details 
; 
 All esds (except the esd in the dihedral angle between two l.s. planes) 
 are estimated using the full covariance matrix.  The cell esds are taken 
 into account individually in the estimation of esds in distances, angles 
 and torsion angles; correlations between esds in cell parameters are only 
 used when they are defined by crystal symmetry.  An approximate (isotropic) 
 treatment of cell esds is used for estimating esds involving l.s. planes. 
; 
 
loop_ 
 _geom_bond_atom_site_label_1 
 _geom_bond_atom_site_label_2 
 _geom_bond_distance 
 _geom_bond_site_symmetry_2 
 _geom_bond_publ_flag 
Pt1 P1 2.2945(8) . ? 
Pt1 P2 2.3401(8) . ? 
Pt1 Si1 2.3458(9) . ? 
Pt1 H1 1.59(4) . ? 
Si1 C1 1.918(3) . ? 
Si1 H2 1.37(4) . ? 
Si1 H3 1.35(4) . ? 
C1 C8 1.545(4) . ? 
C1 C14 1.546(4) . ? 
C1 C2 1.555(4) . ? 
C2 C3 1.385(4) . ? 
C2 C7 1.403(4) . ? 
C3 C4 1.395(5) . ? 
C3 H4 0.9500 . ? 
C4 C5 1.384(5) . ? 
C4 H5 0.9500 . ? 
C5 C6 1.390(5) . ? 
C5 H6 0.9500 . ? 
C6 C7 1.385(4) . ? 
C6 H7 0.9500 . ? 
C7 C20 1.520(4) . ? 
C8 C9 1.386(4) . ? 
C8 C13 1.401(4) . ? 
C9 C10 1.393(4) . ? 
C9 H8 0.9500 . ? 
C10 C11 1.402(5) . ? 
C10 H9 0.9500 . ? 
C11 C12 1.391(5) . ? 
C11 H10 0.9500 . ? 
C12 C13 1.385(4) . ? 
C12 H11 0.9500 . ? 
C13 C20 1.514(4) . ? 
C14 C15 1.383(4) . ? 
C14 C19 1.398(4) . ? 
C15 C16 1.390(4) . ? 
C15 H12 0.9500 . ? 
C16 C17 1.383(5) . ? 
C16 H13 0.9500 . ? 
C17 C18 1.396(5) . ? 
C17 H14 0.9500 . ? 
C18 C19 1.382(4) . ? 
C18 H15 0.9500 . ? 
C19 C20 1.519(4) . ? 
C20 H16 1.0000 . ? 
P1 C27 1.823(3) . ? 
P1 C21 1.823(3) . ? 
P1 C33 1.835(3) . ? 
C21 C22 1.386(4) . ? 
C21 C26 1.395(4) . ? 
C22 C23 1.392(4) . ? 
C22 H17 0.9500 . ? 
C23 C24 1.382(5) . ? 
C23 H18 0.9500 . ? 
C24 C25 1.382(5) . ? 
C24 H19 0.9500 . ? 
C25 C26 1.384(4) . ? 
C25 H20 0.9500 . ? 
C26 H21 0.9500 . ? 
C27 C28 1.387(4) . ? 
C27 C32 1.403(4) . ? 
C28 C29 1.381(4) . ? 
C28 H22 0.9500 . ? 
C29 C30 1.380(5) . ? 
C29 H23 0.9500 . ? 
C30 C31 1.387(5) . ? 
C30 H24 0.9500 . ? 
C31 C32 1.387(4) . ? 
C31 H25 0.9500 . ? 
C32 H26 0.9500 . ? 
C33 C38 1.387(4) . ? 
C33 C34 1.393(4) . ? 
C34 C35 1.382(5) . ? 
C34 H27 0.9500 . ? 
C35 C36 1.388(5) . ? 
C35 H28 0.9500 . ? 
C36 C37 1.384(5) . ? 
C36 H29 0.9500 . ? 
C37 C38 1.392(5) . ? 
C37 H30 0.9500 . ? 
C38 H31 0.9500 . ? 
P2 C39 1.827(3) . ? 
P2 C51 1.828(3) . ? 
P2 C45 1.828(3) . ? 
C39 C44 1.396(5) . ? 
C39 C40 1.401(5) . ? 
C40 C41 1.389(5) . ? 
C40 H32 0.9500 . ? 
C41 C42 1.384(6) . ? 
C41 H33 0.9500 . ? 
C42 C43 1.384(6) . ? 
C42 H34 0.9500 . ? 
C43 C44 1.388(5) . ? 
C43 H35 0.9500 . ? 
C44 H36 0.9500 . ? 
C45 C50 1.392(4) . ? 
C45 C46 1.394(4) . ? 
C46 C47 1.387(5) . ? 
C46 H37 0.9500 . ? 
C47 C48 1.376(5) . ? 
C47 H38 0.9500 . ? 
C48 C49 1.384(5) . ? 
C48 H39 0.9500 . ? 
C49 C50 1.386(5) . ? 
C49 H40 0.9500 . ? 
C50 H41 0.9500 . ? 
C51 C52 1.393(4) . ? 
C51 C56 1.401(4) . ? 
C52 C53 1.393(5) . ? 
C52 H42 0.9500 . ? 
C53 C54 1.385(6) . ? 
C53 H43 0.9500 . ? 
C54 C55 1.375(5) . ? 
C54 H44 0.9500 . ? 
C55 C56 1.389(5) . ? 
C55 H45 0.9500 . ? 
C56 H46 0.9500 . ? 
C57 C58 1.508(6) . ? 
C57 H47 0.9800 . ? 
C57 H48 0.9800 . ? 
C57 H49 0.9800 . ? 
C58 C63 1.391(5) . ? 
C58 C59 1.397(5) . ? 
C59 C60 1.381(5) . ? 
C59 H50 0.9500 . ? 
C60 C61 1.383(5) . ? 
C60 H51 0.9500 . ? 
C61 C62 1.394(5) . ? 
C61 H52 0.9500 . ? 
C62 C63 1.381(5) . ? 
C62 H53 0.9500 . ? 
C63 H54 0.9500 . ? 
 
loop_ 
 _geom_angle_atom_site_label_1 
 _geom_angle_atom_site_label_2 
 _geom_angle_atom_site_label_3 
 _geom_angle 
 _geom_angle_site_symmetry_1 
 _geom_angle_site_symmetry_3 
 _geom_angle_publ_flag 
P1 Pt1 P2 101.63(3) . . ? 
P1 Pt1 Si1 96.17(3) . . ? 
P2 Pt1 Si1 162.13(3) . . ? 
P1 Pt1 H1 175.8(16) . . ? 
P2 Pt1 H1 82.5(16) . . ? 
Si1 Pt1 H1 79.7(16) . . ? 
C1 Si1 Pt1 114.95(10) . . ? 
C1 Si1 H2 105.6(17) . . ? 
Pt1 Si1 H2 112.5(16) . . ? 
C1 Si1 H3 103.3(16) . . ? 
Pt1 Si1 H3 113.6(15) . . ? 
H2 Si1 H3 106(2) . . ? 
C8 C1 C14 105.7(2) . . ? 
C8 C1 C2 102.5(2) . . ? 
C14 C1 C2 103.5(2) . . ? 
C8 C1 Si1 113.9(2) . . ? 
C14 C1 Si1 113.2(2) . . ? 
C2 C1 Si1 116.8(2) . . ? 
C3 C2 C7 119.6(3) . . ? 
C3 C2 C1 127.1(3) . . ? 
C7 C2 C1 113.4(3) . . ? 
C2 C3 C4 119.4(3) . . ? 
C2 C3 H4 120.3 . . ? 
C4 C3 H4 120.3 . . ? 
C5 C4 C3 120.9(3) . . ? 
C5 C4 H5 119.6 . . ? 
C3 C4 H5 119.6 . . ? 
C4 C5 C6 119.9(3) . . ? 
C4 C5 H6 120.1 . . ? 
C6 C5 H6 120.1 . . ? 
C7 C6 C5 119.6(3) . . ? 
C7 C6 H7 120.2 . . ? 
C5 C6 H7 120.2 . . ? 
C6 C7 C2 120.6(3) . . ? 
C6 C7 C20 125.3(3) . . ? 
C2 C7 C20 114.1(3) . . ? 
C9 C8 C13 119.4(3) . . ? 
C9 C8 C1 126.2(3) . . ? 
C13 C8 C1 114.3(3) . . ? 
C8 C9 C10 120.3(3) . . ? 
C8 C9 H8 119.9 . . ? 
C10 C9 H8 119.9 . . ? 
C9 C10 C11 120.0(3) . . ? 
C9 C10 H9 120.0 . . ? 
C11 C10 H9 120.0 . . ? 
C12 C11 C10 119.8(3) . . ? 
C12 C11 H10 120.1 . . ? 
C10 C11 H10 120.1 . . ? 
C13 C12 C11 119.8(3) . . ? 
C13 C12 H11 120.1 . . ? 
C11 C12 H11 120.1 . . ? 
C12 C13 C8 120.8(3) . . ? 
C12 C13 C20 125.7(3) . . ? 
C8 C13 C20 113.5(3) . . ? 
C15 C14 C19 119.1(3) . . ? 
C15 C14 C1 126.2(3) . . ? 
C19 C14 C1 114.5(3) . . ? 
C14 C15 C16 120.1(3) . . ? 
C14 C15 H12 120.0 . . ? 
C16 C15 H12 120.0 . . ? 
C17 C16 C15 120.6(3) . . ? 
C17 C16 H13 119.7 . . ? 
C15 C16 H13 119.7 . . ? 
C16 C17 C18 119.7(3) . . ? 
C16 C17 H14 120.1 . . ? 
C18 C17 H14 120.1 . . ? 
C19 C18 C17 119.4(3) . . ? 
C19 C18 H15 120.3 . . ? 
C17 C18 H15 120.3 . . ? 
C18 C19 C14 121.0(3) . . ? 
C18 C19 C20 125.7(3) . . ? 
C14 C19 C20 113.3(3) . . ? 
C13 C20 C19 107.0(3) . . ? 
C13 C20 C7 105.0(2) . . ? 
C19 C20 C7 104.8(2) . . ? 
C13 C20 H16 113.1 . . ? 
C19 C20 H16 113.1 . . ? 
C7 C20 H16 113.1 . . ? 
C27 P1 C21 107.87(14) . . ? 
C27 P1 C33 101.93(14) . . ? 
C21 P1 C33 99.13(14) . . ? 
C27 P1 Pt1 111.36(10) . . ? 
C21 P1 Pt1 114.16(10) . . ? 
C33 P1 Pt1 120.85(10) . . ? 
C22 C21 C26 119.1(3) . . ? 
C22 C21 P1 118.9(2) . . ? 
C26 C21 P1 121.8(2) . . ? 
C21 C22 C23 120.4(3) . . ? 
C21 C22 H17 119.8 . . ? 
C23 C22 H17 119.8 . . ? 
C24 C23 C22 119.9(3) . . ? 
C24 C23 H18 120.0 . . ? 
C22 C23 H18 120.0 . . ? 
C23 C24 C25 120.0(3) . . ? 
C23 C24 H19 120.0 . . ? 
C25 C24 H19 120.0 . . ? 
C24 C25 C26 120.2(3) . . ? 
C24 C25 H20 119.9 . . ? 
C26 C25 H20 119.9 . . ? 
C25 C26 C21 120.3(3) . . ? 
C25 C26 H21 119.9 . . ? 
C21 C26 H21 119.9 . . ? 
C28 C27 C32 119.0(3) . . ? 
C28 C27 P1 126.0(2) . . ? 
C32 C27 P1 115.0(2) . . ? 
C29 C28 C27 120.5(3) . . ? 
C29 C28 H22 119.7 . . ? 
C27 C28 H22 119.7 . . ? 
C30 C29 C28 120.5(3) . . ? 
C30 C29 H23 119.8 . . ? 
C28 C29 H23 119.8 . . ? 
C29 C30 C31 119.7(3) . . ? 
C29 C30 H24 120.1 . . ? 
C31 C30 H24 120.1 . . ? 
C30 C31 C32 120.3(3) . . ? 
C30 C31 H25 119.9 . . ? 
C32 C31 H25 119.9 . . ? 
C31 C32 C27 120.0(3) . . ? 
C31 C32 H26 120.0 . . ? 
C27 C32 H26 120.0 . . ? 
C38 C33 C34 118.6(3) . . ? 
C38 C33 P1 123.8(2) . . ? 
C34 C33 P1 117.6(2) . . ? 
C35 C34 C33 121.0(3) . . ? 
C35 C34 H27 119.5 . . ? 
C33 C34 H27 119.5 . . ? 
C34 C35 C36 120.0(3) . . ? 
C34 C35 H28 120.0 . . ? 
C36 C35 H28 120.0 . . ? 
C37 C36 C35 119.5(3) . . ? 
C37 C36 H29 120.2 . . ? 
C35 C36 H29 120.2 . . ? 
C36 C37 C38 120.2(3) . . ? 
C36 C37 H30 119.9 . . ? 
C38 C37 H30 119.9 . . ? 
C33 C38 C37 120.6(3) . . ? 
C33 C38 H31 119.7 . . ? 
C37 C38 H31 119.7 . . ? 
C39 P2 C51 102.78(15) . . ? 
C39 P2 C45 105.24(14) . . ? 
C51 P2 C45 102.53(14) . . ? 
C39 P2 Pt1 112.86(11) . . ? 
C51 P2 Pt1 119.65(10) . . ? 
C45 P2 Pt1 112.26(10) . . ? 
C44 C39 C40 118.7(3) . . ? 
C44 C39 P2 118.7(2) . . ? 
C40 C39 P2 122.6(3) . . ? 
C41 C40 C39 120.2(4) . . ? 
C41 C40 H32 119.9 . . ? 
C39 C40 H32 119.9 . . ? 
C42 C41 C40 120.6(4) . . ? 
C42 C41 H33 119.7 . . ? 
C40 C41 H33 119.7 . . ? 
C41 C42 C43 119.6(3) . . ? 
C41 C42 H34 120.2 . . ? 
C43 C42 H34 120.2 . . ? 
C42 C43 C44 120.3(4) . . ? 
C42 C43 H35 119.8 . . ? 
C44 C43 H35 119.8 . . ? 
C43 C44 C39 120.6(3) . . ? 
C43 C44 H36 119.7 . . ? 
C39 C44 H36 119.7 . . ? 
C50 C45 C46 118.7(3) . . ? 
C50 C45 P2 118.4(2) . . ? 
C46 C45 P2 122.9(2) . . ? 
C47 C46 C45 120.5(3) . . ? 
C47 C46 H37 119.8 . . ? 
C45 C46 H37 119.8 . . ? 
C48 C47 C46 120.2(3) . . ? 
C48 C47 H38 119.9 . . ? 
C46 C47 H38 119.9 . . ? 
C47 C48 C49 120.0(3) . . ? 
C47 C48 H39 120.0 . . ? 
C49 C48 H39 120.0 . . ? 
C48 C49 C50 120.1(3) . . ? 
C48 C49 H40 120.0 . . ? 
C50 C49 H40 120.0 . . ? 
C49 C50 C45 120.5(3) . . ? 
C49 C50 H41 119.7 . . ? 
C45 C50 H41 119.7 . . ? 
C52 C51 C56 118.3(3) . . ? 
C52 C51 P2 121.2(2) . . ? 
C56 C51 P2 120.2(2) . . ? 
C53 C52 C51 120.9(3) . . ? 
C53 C52 H42 119.6 . . ? 
C51 C52 H42 119.5 . . ? 
C54 C53 C52 119.8(3) . . ? 
C54 C53 H43 120.1 . . ? 
C52 C53 H43 120.1 . . ? 
C55 C54 C53 120.0(3) . . ? 
C55 C54 H44 120.0 . . ? 
C53 C54 H44 120.0 . . ? 
C54 C55 C56 120.6(3) . . ? 
C54 C55 H45 119.7 . . ? 
C56 C55 H45 119.7 . . ? 
C55 C56 C51 120.4(3) . . ? 
C55 C56 H46 119.8 . . ? 
C51 C56 H46 119.8 . . ? 
C58 C57 H47 109.5 . . ? 
C58 C57 H48 109.5 . . ? 
H47 C57 H48 109.5 . . ? 
C58 C57 H49 109.5 . . ? 
H47 C57 H49 109.5 . . ? 
H48 C57 H49 109.5 . . ? 
C63 C58 C59 117.9(3) . . ? 
C63 C58 C57 121.3(3) . . ? 
C59 C58 C57 120.8(3) . . ? 
C60 C59 C58 120.5(3) . . ? 
C60 C59 H50 119.7 . . ? 
C58 C59 H50 119.7 . . ? 
C59 C60 C61 121.1(3) . . ? 
C59 C60 H51 119.5 . . ? 
C61 C60 H51 119.5 . . ? 
C60 C61 C62 119.0(4) . . ? 
C60 C61 H52 120.5 . . ? 
C62 C61 H52 120.5 . . ? 
C63 C62 C61 119.8(3) . . ? 
C63 C62 H53 120.1 . . ? 
C61 C62 H53 120.1 . . ? 
C62 C63 C58 121.7(3) . . ? 
C62 C63 H54 119.1 . . ? 
C58 C63 H54 119.1 . . ? 
 
_diffrn_measured_fraction_theta_max    0.988 
_diffrn_reflns_theta_full              27.86 
_diffrn_measured_fraction_theta_full   0.988 
_refine_diff_density_max    2.408 
_refine_diff_density_min   -0.926 
_refine_diff_density_rms    0.122 
