# Supplementary material
Source: MDPI journal article supplement (https://www.mdpi.com/2304-6740/5/4/72)
Supplement: s1 [file s1 › NAKA104.CIF]

 
data_naka104 
 
_audit_creation_method            SHELXL-97 
_chemical_name_systematic 
; 
 'C54 H44 Fe P2 Pt Si, C H2 Cl2' 
; 
_chemical_name_common             ? 
_chemical_melting_point           ? 
_chemical_formula_moiety          'C54 H44 Fe P2 Pt Si, C H2 Cl2' 
_chemical_formula_sum 
 'C55 H46 Cl2 Fe P2 Pt Si' 
_chemical_formula_weight          1118.79 
 
loop_ 
 _atom_type_symbol 
 _atom_type_description 
 _atom_type_scat_dispersion_real 
 _atom_type_scat_dispersion_imag 
 _atom_type_scat_source 
 'C'  'C'   0.0033   0.0016 
 'International Tables Vol C Tables 4.2.6.8 and 6.1.1.4' 
 'H'  'H'   0.0000   0.0000 
 'International Tables Vol C Tables 4.2.6.8 and 6.1.1.4' 
 'Si'  'Si'   0.0817   0.0704 
 'International Tables Vol C Tables 4.2.6.8 and 6.1.1.4' 
 'P'  'P'   0.1023   0.0942 
 'International Tables Vol C Tables 4.2.6.8 and 6.1.1.4' 
 'Cl'  'Cl'   0.1484   0.1585 
 'International Tables Vol C Tables 4.2.6.8 and 6.1.1.4' 
 'Fe'  'Fe'   0.3463   0.8444 
 'International Tables Vol C Tables 4.2.6.8 and 6.1.1.4' 
 'Pt'  'Pt'  -1.7033   8.3905 
 'International Tables Vol C Tables 4.2.6.8 and 6.1.1.4' 
 
_symmetry_cell_setting            'monoclinic'
_symmetry_space_group_name_H-M    'P 21'
_symmetry_space_group_name_Hall       'P 2yb'
_symmetry_Int_Tables_number            4
 
loop_ 
 _symmetry_equiv_pos_as_xyz 
 'x, y, z' 
 '-x, y+1/2, -z' 
 
_cell_length_a                    12.2585(6) 
_cell_length_b                    15.5003(7) 
_cell_length_c                    12.9367(6) 
_cell_angle_alpha                 90.00 
_cell_angle_beta                  110.8060(10) 
_cell_angle_gamma                 90.00 
_cell_volume                      2297.81(19) 
_cell_formula_units_Z             2 
_cell_measurement_temperature     103(2) 
_cell_measurement_reflns_used     5891 
_cell_measurement_theta_min       2.21
_cell_measurement_theta_max       27.91
 
_exptl_crystal_description        'prism' 
_exptl_crystal_colour             'yellow'
_exptl_crystal_size_max           0.22 
_exptl_crystal_size_mid           0.15 
_exptl_crystal_size_min           0.05 
_exptl_crystal_density_meas       'not measured' 
_exptl_crystal_density_diffrn     1.617 
_exptl_crystal_density_method     'not measured' 
_exptl_crystal_F_000              1116 
_exptl_absorpt_coefficient_mu     3.607 
_exptl_absorpt_correction_type    'empirical'  
_exptl_absorpt_correction_T_min   0.5042 
_exptl_absorpt_correction_T_max   0.8403 
_exptl_absorpt_process_details    'SADABS (Sheldrick, 1997)' 
 
_exptl_special_details 
; 
 ? 
; 
 
_diffrn_ambient_temperature       103(2) 
_diffrn_radiation_wavelength      0.71073 
_diffrn_radiation_type            MoK\a 
_diffrn_radiation_source          'fine-focus sealed tube' 
_diffrn_radiation_monochromator   graphite 
_diffrn_measurement_device_type   'CCD area detector'
_diffrn_measurement_method        'phi and omega scans'  
_diffrn_detector_area_resol_mean  ? 
_diffrn_standards_number          ? 
_diffrn_standards_interval_count  ? 
_diffrn_standards_interval_time   ? 
_diffrn_standards_decay_%         ? 
_diffrn_reflns_number             14098 
_diffrn_reflns_av_R_equivalents   0.0329 
_diffrn_reflns_av_sigmaI/netI     0.0565 
_diffrn_reflns_limit_h_min        -14 
_diffrn_reflns_limit_h_max        14 
_diffrn_reflns_limit_k_min        -17 
_diffrn_reflns_limit_k_max        18 
_diffrn_reflns_limit_l_min        -12 
_diffrn_reflns_limit_l_max        15 
_diffrn_reflns_theta_min          1.68 
_diffrn_reflns_theta_max          25.50 
_reflns_number_total              8350 
_reflns_number_gt                 7924 
_reflns_threshold_expression      >2sigma(I) 
 
_computing_data_collection        'Bruker SMART'
_computing_cell_refinement        'Bruker SAINT'
_computing_data_reduction         'Bruker SAINT' 
_computing_structure_solution     'SHELXS-97 (Sheldrick, 1990)' 
_computing_structure_refinement   'SHELXL-97 (Sheldrick, 1997)' 
_computing_molecular_graphics 'Yadokari-XG 2009 (Wakita, Nemoto et al., 2009)'
_computing_publication_material 'Yadokari-XG 2009 (Wakita, Nemoto et al., 2009)'
_publ_section_references
;
Wakita, K. (2001). Yadokari-XG. Software for Crystal Structure Analyses.
Release of Software (Yadokari-XG 2009) for Crystal Structure Analyses,
Kabuto, C., Akine, S., Nemoto, T. & Kwon, E. (2009). J. Cryst. Soc. Jpn.,51,
218-224.
;  
 
_refine_special_details 
; 
 Refinement of F^2^ against ALL reflections.  The weighted R-factor wR and 
 goodness of fit S are based on F^2^, conventional R-factors R are based 
 on F, with F set to zero for negative F^2^. The threshold expression of 
 F^2^ > 2sigma(F^2^) is used only for calculating R-factors(gt) etc. and is 
 not relevant to the choice of reflections for refinement.  R-factors based 
 on F^2^ are statistically about twice as large as those based on F, and R- 
 factors based on ALL data will be even larger. 
; 
 
_refine_ls_structure_factor_coef  Fsqd  
_refine_ls_matrix_type            full 
_refine_ls_weighting_scheme       calc  
_refine_ls_weighting_details 
 'calc w=1/[\s^2^(Fo^2^)+(0.0657P)^2^+14.2394P] where P=(Fo^2^+2Fc^2^)/3' 
_atom_sites_solution_primary      direct 
_atom_sites_solution_secondary    difmap 
_atom_sites_solution_hydrogens    geom 
_refine_ls_hydrogen_treatment     mixed 
_refine_ls_extinction_method      none 
_refine_ls_extinction_coef        ? 
_refine_ls_abs_structure_details 
 'Flack H D (1983), Acta Cryst. A39, 876-881' 
_refine_ls_abs_structure_Flack    0.501(8) 
_refine_ls_number_reflns          8350 
_refine_ls_number_parameters      571 
_refine_ls_number_restraints      2 
_refine_ls_R_factor_all           0.0510 
_refine_ls_R_factor_gt            0.0484 
_refine_ls_wR_factor_ref          0.1191 
_refine_ls_wR_factor_gt           0.1171 
_refine_ls_goodness_of_fit_ref    1.018 
_refine_ls_restrained_S_all       1.018 
_refine_ls_shift/su_max           0.000 
_refine_ls_shift/su_mean          0.000 
 
loop_ 
 _atom_site_label 
 _atom_site_type_symbol 
 _atom_site_fract_x 
 _atom_site_fract_y 
 _atom_site_fract_z 
 _atom_site_U_iso_or_equiv 
 _atom_site_adp_type 
 _atom_site_occupancy 
 _atom_site_symmetry_multiplicity 
 _atom_site_calc_flag 
 _atom_site_refinement_flags 
 _atom_site_disorder_assembly 
 _atom_site_disorder_group 
Pt1 Pt 0.08227(2) 0.01014(2) 0.29072(2) 0.01359(9) Uani 1 1 d D . . 
H1 H -0.031(9) 0.061(9) 0.196(10) 0.08(5) Uiso 1 1 d D . . 
Si1 Si -0.0768(2) -0.08075(16) 0.2649(2) 0.0180(5) Uani 1 1 d . . . 
H2 H -0.064(11) -0.167(9) 0.235(11) 0.05(4) Uiso 1 1 d . . . 
H3 H -0.099(8) -0.096(6) 0.362(8) 0.02(3) Uiso 1 1 d . . . 
C1 C -0.2264(8) -0.0496(6) 0.1592(8) 0.019(2) Uani 1 1 d . . . 
C2 C -0.3253(8) -0.1140(6) 0.1559(7) 0.0169(19) Uani 1 1 d . . . 
C3 C -0.3144(9) -0.1854(7) 0.2227(8) 0.021(2) Uani 1 1 d . . . 
H4 H -0.2408 -0.1994 0.2768 0.025 Uiso 1 1 calc R . . 
C4 C -0.4128(10) -0.2378(7) 0.2104(9) 0.027(2) Uani 1 1 d . . . 
H5 H -0.4056 -0.2868 0.2565 0.032 Uiso 1 1 calc R . . 
C5 C -0.5190(9) -0.2176(7) 0.1315(8) 0.027(2) Uani 1 1 d . . . 
H6 H -0.5850 -0.2528 0.1231 0.032 Uiso 1 1 calc R . . 
C6 C -0.5304(8) -0.1460(7) 0.0641(8) 0.022(2) Uani 1 1 d . . . 
H7 H -0.6036 -0.1323 0.0092 0.026 Uiso 1 1 calc R . . 
C7 C -0.4328(9) -0.0945(7) 0.0780(9) 0.015(2) Uani 1 1 d . . . 
C8 C -0.2305(8) -0.0476(6) 0.0381(8) 0.019(2) Uani 1 1 d . . . 
C9 C -0.1381(9) -0.0622(6) 0.0029(8) 0.020(2) Uani 1 1 d . . . 
H8 H -0.0628 -0.0741 0.0555 0.024 Uiso 1 1 calc R . . 
C10 C -0.1549(9) -0.0596(6) -0.1100(8) 0.023(2) Uani 1 1 d . . . 
H9 H -0.0917 -0.0713 -0.1341 0.028 Uiso 1 1 calc R . . 
C11 C -0.2632(9) -0.0400(6) -0.1859(8) 0.025(2) Uani 1 1 d . . . 
H10 H -0.2742 -0.0370 -0.2623 0.029 Uiso 1 1 calc R . . 
C12 C -0.3557(9) -0.0248(6) -0.1516(8) 0.024(2) Uani 1 1 d . . . 
H11 H -0.4305 -0.0117 -0.2043 0.029 Uiso 1 1 calc R . . 
C13 C -0.3395(8) -0.0285(6) -0.0404(8) 0.0189(19) Uani 1 1 d . . . 
C14 C -0.2778(8) 0.0368(6) 0.1761(8) 0.023(2) Uani 1 1 d . . . 
C15 C -0.2263(8) 0.0964(6) 0.2607(8) 0.0187(19) Uani 1 1 d . . . 
H12 H -0.1533 0.0839 0.3166 0.022 Uiso 1 1 calc R . . 
C16 C -0.2824(10) 0.1738(7) 0.2627(9) 0.025(2) Uani 1 1 d . . . 
H13 H -0.2477 0.2140 0.3206 0.030 Uiso 1 1 calc R . . 
C17 C -0.3881(9) 0.1932(7) 0.1814(9) 0.025(2) Uani 1 1 d . . . 
H14 H -0.4242 0.2472 0.1828 0.030 Uiso 1 1 calc R . . 
C18 C -0.4426(11) 0.1345(8) 0.0971(10) 0.025(3) Uani 1 1 d . . . 
H15 H -0.5163 0.1472 0.0423 0.030 Uiso 1 1 calc R . . 
C19 C -0.3868(8) 0.0577(6) 0.0956(8) 0.019(2) Uani 1 1 d . . . 
C20 C -0.4323(8) -0.0133(6) 0.0111(8) 0.022(2) Uani 1 1 d . . . 
H16 H -0.5107 0.0001 -0.0451 0.026 Uiso 1 1 calc R . . 
P1 P 0.2145(2) -0.07700(15) 0.41649(19) 0.0161(5) Uani 1 1 d . . . 
C21 C 0.3596(8) -0.0749(6) 0.4128(8) 0.0173(19) Uani 1 1 d . . . 
C22 C 0.3818(8) -0.0588(6) 0.3124(9) 0.023(2) Uani 1 1 d . . . 
H17 H 0.3243 -0.0512 0.2410 0.027 Uiso 1 1 calc R . . 
C23 C 0.5050(10) -0.0564(7) 0.3386(9) 0.030(2) Uani 1 1 d . . . 
H18 H 0.5440 -0.0476 0.2879 0.036 Uiso 1 1 calc R . . 
C24 C 0.5584(10) -0.0694(8) 0.4537(10) 0.034(3) Uani 1 1 d . . . 
H19 H 0.6402 -0.0702 0.4935 0.041 Uiso 1 1 calc R . . 
C25 C 0.4717(9) -0.0810(7) 0.5002(10) 0.029(2) Uani 1 1 d . . . 
H20 H 0.4848 -0.0910 0.5762 0.035 Uiso 1 1 calc R . . 
Fe1 Fe 0.45111(11) 0.03575(8) 0.42450(11) 0.0196(3) Uani 1 1 d . . . 
C26 C 0.3455(8) 0.1406(7) 0.3775(8) 0.020(2) Uani 1 1 d . . . 
C27 C 0.4467(8) 0.1515(6) 0.3474(8) 0.023(2) Uani 1 1 d . . . 
H21 H 0.4472 0.1602 0.2749 0.027 Uiso 1 1 calc R . . 
C28 C 0.5461(9) 0.1467(8) 0.4465(9) 0.028(2) Uani 1 1 d . . . 
H22 H 0.6251 0.1508 0.4514 0.034 Uiso 1 1 calc R . . 
C29 C 0.5076(10) 0.1349(7) 0.5368(9) 0.030(2) Uani 1 1 d . . . 
H23 H 0.5560 0.1304 0.6125 0.036 Uiso 1 1 calc R . . 
C30 C 0.3858(8) 0.1309(6) 0.4947(8) 0.022(2) Uani 1 1 d . . . 
H24 H 0.3374 0.1230 0.5373 0.026 Uiso 1 1 calc R . . 
P2 P 0.1942(2) 0.12983(15) 0.2867(2) 0.0172(5) Uani 1 1 d . . . 
C31 C 0.1806(8) -0.1928(6) 0.4083(8) 0.022(2) Uani 1 1 d . . . 
C32 C 0.2133(9) -0.2467(7) 0.3392(8) 0.025(2) Uani 1 1 d . . . 
H25 H 0.2600 -0.2243 0.3005 0.030 Uiso 1 1 calc R . . 
C33 C 0.1798(10) -0.3318(7) 0.3250(10) 0.036(3) Uani 1 1 d . . . 
H26 H 0.2047 -0.3684 0.2788 0.043 Uiso 1 1 calc R . . 
C34 C 0.1079(13) -0.3634(8) 0.3803(12) 0.037(3) Uani 1 1 d . . . 
H27 H 0.0836 -0.4220 0.3712 0.045 Uiso 1 1 calc R . . 
C35 C 0.0728(10) -0.3109(7) 0.4464(10) 0.036(3) Uani 1 1 d . . . 
H28 H 0.0243 -0.3331 0.4834 0.044 Uiso 1 1 calc R . . 
C36 C 0.1074(8) -0.2246(7) 0.4607(8) 0.024(2) Uani 1 1 d . . . 
H29 H 0.0811 -0.1878 0.5058 0.029 Uiso 1 1 calc R . . 
C37 C 0.2343(8) -0.0491(6) 0.5597(7) 0.0188(19) Uani 1 1 d . . . 
C38 C 0.3004(8) -0.0991(6) 0.6485(8) 0.0197(19) Uani 1 1 d . . . 
H30 H 0.3337 -0.1517 0.6364 0.024 Uiso 1 1 calc R . . 
C39 C 0.3180(9) -0.0719(7) 0.7556(9) 0.026(2) Uani 1 1 d . . . 
H31 H 0.3641 -0.1058 0.8166 0.031 Uiso 1 1 calc R . . 
C40 C 0.2690(7) 0.0038(9) 0.7738(7) 0.0231(19) Uani 1 1 d . . . 
H32 H 0.2830 0.0223 0.8474 0.028 Uiso 1 1 calc R . . 
C41 C 0.1992(9) 0.0534(7) 0.6854(8) 0.027(2) Uani 1 1 d . . . 
H33 H 0.1636 0.1048 0.6981 0.032 Uiso 1 1 calc R . . 
C42 C 0.1824(8) 0.0265(6) 0.5777(8) 0.019(2) Uani 1 1 d . . . 
H34 H 0.1355 0.0599 0.5165 0.023 Uiso 1 1 calc R . . 
C43 C 0.1986(8) 0.1480(6) 0.1492(7) 0.0161(18) Uani 1 1 d . . . 
C44 C 0.1424(9) 0.0903(6) 0.0650(8) 0.024(2) Uani 1 1 d . . . 
H35 H 0.1045 0.0412 0.0808 0.029 Uiso 1 1 calc R . . 
C45 C 0.1407(10) 0.1029(7) -0.0413(9) 0.031(2) Uani 1 1 d . . . 
H36 H 0.1020 0.0630 -0.0982 0.038 Uiso 1 1 calc R . . 
C46 C 0.1967(10) 0.1752(7) -0.0640(9) 0.030(2) Uani 1 1 d . . . 
H37 H 0.1950 0.1851 -0.1371 0.036 Uiso 1 1 calc R . . 
C47 C 0.2544(9) 0.2319(7) 0.0193(9) 0.028(2) Uani 1 1 d . . . 
H38 H 0.2945 0.2800 0.0042 0.033 Uiso 1 1 calc R . . 
C48 C 0.2538(8) 0.2193(6) 0.1238(8) 0.022(2) Uani 1 1 d . . . 
H39 H 0.2918 0.2599 0.1801 0.027 Uiso 1 1 calc R . . 
C49 C 0.1269(8) 0.2293(6) 0.3116(8) 0.0189(19) Uani 1 1 d . . . 
C50 C 0.0112(9) 0.2440(6) 0.2499(8) 0.023(2) Uani 1 1 d . . . 
H40 H -0.0314 0.2018 0.1980 0.028 Uiso 1 1 calc R . . 
C51 C -0.0444(9) 0.3196(7) 0.2623(9) 0.028(2) Uani 1 1 d . . . 
H41 H -0.1230 0.3303 0.2162 0.034 Uiso 1 1 calc R . . 
C52 C 0.0161(10) 0.3792(7) 0.3427(10) 0.031(2) Uani 1 1 d . . . 
H42 H -0.0220 0.4297 0.3541 0.037 Uiso 1 1 calc R . . 
C53 C 0.1286(12) 0.3649(9) 0.4041(14) 0.044(4) Uani 1 1 d . . . 
H43 H 0.1691 0.4064 0.4582 0.053 Uiso 1 1 calc R . . 
C54 C 0.1884(9) 0.2905(7) 0.3911(9) 0.029(2) Uani 1 1 d . . . 
H44 H 0.2682 0.2819 0.4350 0.035 Uiso 1 1 calc R . . 
C55 C 0.9201(9) 0.2590(7) 0.9576(9) 0.028(2) Uani 1 1 d . . . 
H45 H 0.9382 0.2555 0.8890 0.033 Uiso 1 1 calc R . . 
H46 H 0.9948 0.2584 1.0212 0.033 Uiso 1 1 calc R . . 
Cl1 Cl 0.8446(2) 0.35747(17) 0.9583(2) 0.0339(6) Uani 1 1 d . . . 
Cl2 Cl 0.8363(3) 0.16994(18) 0.9655(3) 0.0403(7) Uani 1 1 d . . . 
 
loop_ 
 _atom_site_aniso_label 
 _atom_site_aniso_U_11 
 _atom_site_aniso_U_22 
 _atom_site_aniso_U_33 
 _atom_site_aniso_U_23 
 _atom_site_aniso_U_13 
 _atom_site_aniso_U_12 
Pt1 0.01119(14) 0.01359(15) 0.01517(14) 0.00126(18) 0.00368(10) -0.00001(18) 
Si1 0.0163(13) 0.0164(12) 0.0203(13) 0.0011(10) 0.0053(10) -0.0016(10) 
C1 0.011(5) 0.024(5) 0.019(5) -0.005(4) 0.000(4) -0.008(4) 
C2 0.015(5) 0.020(5) 0.019(4) -0.007(4) 0.010(4) -0.002(4) 
C3 0.019(5) 0.024(5) 0.022(5) -0.004(4) 0.011(4) -0.001(4) 
C4 0.039(6) 0.024(5) 0.026(5) -0.005(4) 0.022(5) -0.007(5) 
C5 0.032(6) 0.028(5) 0.025(5) -0.011(4) 0.017(5) -0.013(4) 
C6 0.018(5) 0.030(5) 0.021(5) -0.005(4) 0.009(4) -0.004(4) 
C7 0.013(5) 0.015(5) 0.017(5) -0.009(4) 0.005(4) -0.005(4) 
C8 0.020(5) 0.021(5) 0.022(5) -0.005(4) 0.013(4) -0.003(4) 
C9 0.022(5) 0.011(4) 0.031(5) -0.004(4) 0.014(4) 0.001(4) 
C10 0.033(6) 0.016(5) 0.029(5) -0.005(4) 0.021(5) -0.002(4) 
C11 0.035(6) 0.025(5) 0.017(5) -0.002(4) 0.013(4) -0.002(4) 
C12 0.028(5) 0.019(4) 0.020(5) -0.006(4) 0.003(4) -0.006(4) 
C13 0.014(4) 0.016(4) 0.027(5) -0.001(4) 0.007(4) -0.003(4) 
C14 0.018(5) 0.037(7) 0.014(4) 0.004(4) 0.007(4) -0.002(4) 
C15 0.021(5) 0.021(5) 0.016(4) -0.005(4) 0.009(4) -0.006(4) 
C16 0.035(6) 0.019(5) 0.030(6) -0.007(4) 0.023(5) -0.010(4) 
C17 0.025(6) 0.024(5) 0.033(6) 0.000(4) 0.017(5) 0.008(4) 
C18 0.022(6) 0.023(6) 0.036(6) 0.004(5) 0.015(5) 0.001(5) 
C19 0.021(5) 0.021(5) 0.022(5) 0.003(4) 0.014(4) 0.000(4) 
C20 0.015(4) 0.029(6) 0.019(4) 0.004(4) 0.004(4) -0.002(4) 
P1 0.0161(11) 0.0165(11) 0.0145(11) 0.0008(9) 0.0041(9) 0.0010(9) 
C21 0.016(5) 0.010(5) 0.023(5) -0.002(4) 0.004(4) 0.001(4) 
C22 0.016(5) 0.023(5) 0.030(5) -0.007(4) 0.010(4) 0.001(4) 
C23 0.033(6) 0.026(5) 0.038(6) -0.002(5) 0.021(5) 0.005(5) 
C24 0.022(6) 0.036(7) 0.042(7) 0.007(5) 0.010(5) 0.011(5) 
C25 0.023(6) 0.026(6) 0.030(6) 0.009(5) 0.001(5) 0.003(5) 
Fe1 0.0125(6) 0.0270(9) 0.0195(6) 0.0003(5) 0.0058(5) 0.0003(5) 
C26 0.018(5) 0.019(5) 0.023(5) -0.004(4) 0.007(4) -0.002(4) 
C27 0.017(5) 0.024(5) 0.029(5) 0.002(4) 0.010(4) -0.004(4) 
C28 0.019(5) 0.030(6) 0.038(6) -0.005(5) 0.011(5) -0.009(5) 
C29 0.029(6) 0.034(6) 0.022(5) -0.004(5) 0.004(5) -0.006(5) 
C30 0.020(5) 0.022(5) 0.024(5) -0.006(4) 0.009(4) -0.005(4) 
P2 0.0183(12) 0.0163(12) 0.0180(12) -0.0012(9) 0.0077(10) 0.0003(9) 
C31 0.020(5) 0.017(5) 0.027(5) 0.002(4) 0.003(4) 0.006(4) 
C32 0.027(6) 0.023(5) 0.020(5) -0.003(4) 0.001(4) 0.003(4) 
C33 0.030(6) 0.027(6) 0.036(6) -0.013(5) -0.005(5) 0.011(5) 
C34 0.045(8) 0.011(5) 0.046(7) 0.002(5) 0.003(6) -0.002(5) 
C35 0.036(6) 0.026(6) 0.038(6) 0.010(5) 0.001(5) -0.006(5) 
C36 0.018(5) 0.026(5) 0.022(5) 0.002(4) 0.001(4) -0.005(4) 
C37 0.014(5) 0.024(5) 0.016(4) -0.001(4) 0.002(4) -0.008(4) 
C38 0.019(5) 0.019(5) 0.021(5) 0.002(4) 0.006(4) -0.002(4) 
C39 0.020(5) 0.032(6) 0.027(5) 0.007(4) 0.009(4) 0.002(4) 
C40 0.020(4) 0.028(5) 0.020(4) -0.005(5) 0.006(3) -0.012(6) 
C41 0.020(5) 0.032(5) 0.029(5) -0.005(4) 0.011(4) 0.006(4) 
C42 0.015(4) 0.018(7) 0.025(4) 0.003(4) 0.010(3) 0.001(4) 
C43 0.015(4) 0.014(4) 0.022(5) 0.006(4) 0.010(4) 0.005(3) 
C44 0.029(5) 0.020(5) 0.028(5) 0.002(4) 0.015(4) 0.001(4) 
C45 0.037(6) 0.034(6) 0.028(6) -0.010(5) 0.017(5) 0.002(5) 
C46 0.033(6) 0.030(6) 0.033(6) 0.005(5) 0.017(5) 0.011(5) 
C47 0.027(5) 0.024(5) 0.034(6) 0.010(4) 0.013(5) 0.002(4) 
C48 0.022(5) 0.019(5) 0.025(5) -0.001(4) 0.008(4) 0.004(4) 
C49 0.021(5) 0.015(4) 0.025(5) -0.002(4) 0.015(4) 0.000(4) 
C50 0.026(5) 0.024(5) 0.020(5) -0.002(4) 0.008(4) 0.001(4) 
C51 0.026(5) 0.029(6) 0.036(6) 0.003(5) 0.018(5) 0.001(4) 
C52 0.029(6) 0.021(5) 0.052(7) -0.005(5) 0.027(5) -0.002(4) 
C53 0.033(7) 0.035(8) 0.071(10) -0.031(7) 0.027(7) -0.011(6) 
C54 0.015(5) 0.038(7) 0.036(6) -0.015(5) 0.012(5) -0.006(4) 
C55 0.020(5) 0.027(5) 0.031(6) -0.001(4) 0.003(4) 0.003(4) 
Cl1 0.0242(13) 0.0268(13) 0.0494(16) 0.0071(12) 0.0115(12) 0.0026(10) 
Cl2 0.0382(16) 0.0262(14) 0.0488(17) 0.0033(12) 0.0061(13) -0.0044(12) 
 
_geom_special_details 
; 
 All esds (except the esd in the dihedral angle between two l.s. planes) 
 are estimated using the full covariance matrix.  The cell esds are taken 
 into account individually in the estimation of esds in distances, angles 
 and torsion angles; correlations between esds in cell parameters are only 
 used when they are defined by crystal symmetry.  An approximate (isotropic) 
 treatment of cell esds is used for estimating esds involving l.s. planes. 
; 
 
loop_ 
 _geom_bond_atom_site_label_1 
 _geom_bond_atom_site_label_2 
 _geom_bond_distance 
 _geom_bond_site_symmetry_2 
 _geom_bond_publ_flag 
Pt1 P1 2.286(2) . ? 
Pt1 P2 2.319(2) . ? 
Pt1 Si1 2.331(3) . ? 
Pt1 H1 1.687(10) . ? 
Si1 C1 1.920(10) . ? 
Si1 H2 1.42(14) . ? 
Si1 H3 1.40(10) . ? 
C1 C14 1.529(14) . ? 
C1 C8 1.550(13) . ? 
C1 C2 1.559(12) . ? 
C2 C7 1.379(14) . ? 
C2 C3 1.381(14) . ? 
C3 C4 1.416(15) . ? 
C3 H4 0.9500 . ? 
C4 C5 1.375(15) . ? 
C4 H5 0.9500 . ? 
C5 C6 1.387(15) . ? 
C5 H6 0.9500 . ? 
C6 C7 1.396(14) . ? 
C6 H7 0.9500 . ? 
C7 C20 1.528(13) . ? 
C8 C9 1.380(13) . ? 
C8 C13 1.393(13) . ? 
C9 C10 1.401(14) . ? 
C9 H8 0.9500 . ? 
C10 C11 1.375(15) . ? 
C10 H9 0.9500 . ? 
C11 C12 1.377(14) . ? 
C11 H10 0.9500 . ? 
C12 C13 1.382(14) . ? 
C12 H11 0.9500 . ? 
C13 C20 1.527(12) . ? 
C14 C15 1.400(13) . ? 
C14 C19 1.409(14) . ? 
C15 C16 1.388(14) . ? 
C15 H12 0.9500 . ? 
C16 C17 1.381(15) . ? 
C16 H13 0.9500 . ? 
C17 C18 1.394(16) . ? 
C17 H14 0.9500 . ? 
C18 C19 1.377(15) . ? 
C18 H15 0.9500 . ? 
C19 C20 1.511(13) . ? 
C20 H16 1.0000 . ? 
P1 C21 1.796(9) . ? 
P1 C37 1.833(10) . ? 
P1 C31 1.837(10) . ? 
C21 C25 1.439(14) . ? 
C21 C22 1.441(14) . ? 
C21 Fe1 2.025(10) . ? 
C22 C23 1.426(14) . ? 
C22 Fe1 2.024(10) . ? 
C22 H17 0.9500 . ? 
C23 C24 1.412(16) . ? 
C23 Fe1 2.057(10) . ? 
C23 H18 0.9500 . ? 
C24 C25 1.407(16) . ? 
C24 Fe1 2.044(11) . ? 
C24 H19 0.9500 . ? 
C25 Fe1 2.030(11) . ? 
C25 H20 0.9500 . ? 
Fe1 C26 2.032(10) . ? 
Fe1 C30 2.039(10) . ? 
Fe1 C28 2.039(11) . ? 
Fe1 C27 2.043(10) . ? 
Fe1 C29 2.059(11) . ? 
C26 C30 1.426(14) . ? 
C26 C27 1.436(13) . ? 
C26 P2 1.816(10) . ? 
C27 C28 1.423(15) . ? 
C27 H21 0.9500 . ? 
C28 C29 1.420(15) . ? 
C28 H22 0.9500 . ? 
C29 C30 1.397(14) . ? 
C29 H23 0.9500 . ? 
C30 H24 0.9500 . ? 
P2 C43 1.822(9) . ? 
P2 C49 1.831(9) . ? 
C31 C32 1.383(14) . ? 
C31 C36 1.393(14) . ? 
C32 C33 1.374(16) . ? 
C32 H25 0.9500 . ? 
C33 C34 1.406(19) . ? 
C33 H26 0.9500 . ? 
C34 C35 1.357(19) . ? 
C34 H27 0.9500 . ? 
C35 C36 1.395(15) . ? 
C35 H28 0.9500 . ? 
C36 H29 0.9500 . ? 
C37 C38 1.385(13) . ? 
C37 C42 1.391(13) . ? 
C38 C39 1.389(14) . ? 
C38 H30 0.9500 . ? 
C39 C40 1.376(17) . ? 
C39 H31 0.9500 . ? 
C40 C41 1.391(15) . ? 
C40 H32 0.9500 . ? 
C41 C42 1.399(14) . ? 
C41 H33 0.9500 . ? 
C42 H34 0.9500 . ? 
C43 C44 1.388(14) . ? 
C43 C48 1.395(13) . ? 
C44 C45 1.382(15) . ? 
C44 H35 0.9500 . ? 
C45 C46 1.398(16) . ? 
C45 H36 0.9500 . ? 
C46 C47 1.376(16) . ? 
C46 H37 0.9500 . ? 
C47 C48 1.369(14) . ? 
C47 H38 0.9500 . ? 
C48 H39 0.9500 . ? 
C49 C50 1.376(14) . ? 
C49 C54 1.405(14) . ? 
C50 C51 1.393(15) . ? 
C50 H40 0.9500 . ? 
C51 C52 1.393(16) . ? 
C51 H41 0.9500 . ? 
C52 C53 1.342(18) . ? 
C52 H42 0.9500 . ? 
C53 C54 1.409(17) . ? 
C53 H43 0.9500 . ? 
C54 H44 0.9500 . ? 
C55 Cl2 1.745(11) . ? 
C55 Cl1 1.786(10) . ? 
C55 H45 0.9900 . ? 
C55 H46 0.9900 . ? 
 
loop_ 
 _geom_angle_atom_site_label_1 
 _geom_angle_atom_site_label_2 
 _geom_angle_atom_site_label_3 
 _geom_angle 
 _geom_angle_site_symmetry_1 
 _geom_angle_site_symmetry_3 
 _geom_angle_publ_flag 
P1 Pt1 P2 102.29(9) . . ? 
P1 Pt1 Si1 95.19(9) . . ? 
P2 Pt1 Si1 162.10(9) . . ? 
P1 Pt1 H1 171(5) . . ? 
P2 Pt1 H1 87(5) . . ? 
Si1 Pt1 H1 76(5) . . ? 
C1 Si1 Pt1 119.3(3) . . ? 
C1 Si1 H2 102(5) . . ? 
Pt1 Si1 H2 116(5) . . ? 
C1 Si1 H3 104(4) . . ? 
Pt1 Si1 H3 113(4) . . ? 
H2 Si1 H3 99(6) . . ? 
C14 C1 C8 105.0(8) . . ? 
C14 C1 C2 102.1(7) . . ? 
C8 C1 C2 103.9(7) . . ? 
C14 C1 Si1 117.2(6) . . ? 
C8 C1 Si1 113.8(7) . . ? 
C2 C1 Si1 113.3(7) . . ? 
C7 C2 C3 119.2(9) . . ? 
C7 C2 C1 114.3(8) . . ? 
C3 C2 C1 126.5(9) . . ? 
C2 C3 C4 120.0(10) . . ? 
C2 C3 H4 120.0 . . ? 
C4 C3 H4 120.0 . . ? 
C5 C4 C3 119.8(10) . . ? 
C5 C4 H5 120.1 . . ? 
C3 C4 H5 120.1 . . ? 
C4 C5 C6 120.4(9) . . ? 
C4 C5 H6 119.8 . . ? 
C6 C5 H6 119.8 . . ? 
C5 C6 C7 119.1(9) . . ? 
C5 C6 H7 120.4 . . ? 
C7 C6 H7 120.4 . . ? 
C2 C7 C6 121.4(10) . . ? 
C2 C7 C20 113.5(8) . . ? 
C6 C7 C20 125.0(9) . . ? 
C9 C8 C13 118.7(9) . . ? 
C9 C8 C1 126.5(9) . . ? 
C13 C8 C1 114.8(8) . . ? 
C8 C9 C10 120.3(9) . . ? 
C8 C9 H8 119.8 . . ? 
C10 C9 H8 119.8 . . ? 
C11 C10 C9 119.9(9) . . ? 
C11 C10 H9 120.1 . . ? 
C9 C10 H9 120.1 . . ? 
C10 C11 C12 120.3(9) . . ? 
C10 C11 H10 119.9 . . ? 
C12 C11 H10 119.9 . . ? 
C11 C12 C13 119.9(9) . . ? 
C11 C12 H11 120.1 . . ? 
C13 C12 H11 120.1 . . ? 
C12 C13 C8 120.9(9) . . ? 
C12 C13 C20 126.4(9) . . ? 
C8 C13 C20 112.6(8) . . ? 
C15 C14 C19 118.2(9) . . ? 
C15 C14 C1 126.6(9) . . ? 
C19 C14 C1 115.2(8) . . ? 
C16 C15 C14 119.8(9) . . ? 
C16 C15 H12 120.1 . . ? 
C14 C15 H12 120.1 . . ? 
C17 C16 C15 120.7(9) . . ? 
C17 C16 H13 119.6 . . ? 
C15 C16 H13 119.6 . . ? 
C16 C17 C18 120.9(10) . . ? 
C16 C17 H14 119.6 . . ? 
C18 C17 H14 119.6 . . ? 
C19 C18 C17 118.2(11) . . ? 
C19 C18 H15 120.9 . . ? 
C17 C18 H15 120.9 . . ? 
C18 C19 C14 122.2(10) . . ? 
C18 C19 C20 125.7(9) . . ? 
C14 C19 C20 112.1(8) . . ? 
C19 C20 C13 106.7(7) . . ? 
C19 C20 C7 105.3(8) . . ? 
C13 C20 C7 105.9(8) . . ? 
C19 C20 H16 112.8 . . ? 
C13 C20 H16 112.8 . . ? 
C7 C20 H16 112.8 . . ? 
C21 P1 C37 104.2(4) . . ? 
C21 P1 C31 102.8(4) . . ? 
C37 P1 C31 103.6(4) . . ? 
C21 P1 Pt1 115.4(3) . . ? 
C37 P1 Pt1 112.7(3) . . ? 
C31 P1 Pt1 116.6(3) . . ? 
C25 C21 C22 106.6(8) . . ? 
C25 C21 P1 131.0(8) . . ? 
C22 C21 P1 122.2(7) . . ? 
C25 C21 Fe1 69.4(6) . . ? 
C22 C21 Fe1 69.1(5) . . ? 
P1 C21 Fe1 122.7(5) . . ? 
C23 C22 C21 108.3(9) . . ? 
C23 C22 Fe1 70.8(6) . . ? 
C21 C22 Fe1 69.2(5) . . ? 
C23 C22 H17 125.9 . . ? 
C21 C22 H17 125.9 . . ? 
Fe1 C22 H17 125.7 . . ? 
C24 C23 C22 107.6(10) . . ? 
C24 C23 Fe1 69.4(6) . . ? 
C22 C23 Fe1 68.3(6) . . ? 
C24 C23 H18 126.2 . . ? 
C22 C23 H18 126.2 . . ? 
Fe1 C23 H18 127.7 . . ? 
C25 C24 C23 109.3(10) . . ? 
C25 C24 Fe1 69.3(6) . . ? 
C23 C24 Fe1 70.4(6) . . ? 
C25 C24 H19 125.3 . . ? 
C23 C24 H19 125.3 . . ? 
Fe1 C24 H19 126.6 . . ? 
C24 C25 C21 108.2(10) . . ? 
C24 C25 Fe1 70.3(7) . . ? 
C21 C25 Fe1 69.1(6) . . ? 
C24 C25 H20 125.9 . . ? 
C21 C25 H20 125.9 . . ? 
Fe1 C25 H20 126.3 . . ? 
C22 Fe1 C21 41.7(4) . . ? 
C22 Fe1 C25 69.4(4) . . ? 
C21 Fe1 C25 41.6(4) . . ? 
C22 Fe1 C26 107.7(4) . . ? 
C21 Fe1 C26 112.2(4) . . ? 
C25 Fe1 C26 144.5(4) . . ? 
C22 Fe1 C30 135.4(4) . . ? 
C21 Fe1 C30 110.5(4) . . ? 
C25 Fe1 C30 115.5(4) . . ? 
C26 Fe1 C30 41.0(4) . . ? 
C22 Fe1 C28 141.6(4) . . ? 
C21 Fe1 C28 176.5(4) . . ? 
C25 Fe1 C28 135.8(5) . . ? 
C26 Fe1 C28 68.8(4) . . ? 
C30 Fe1 C28 67.9(4) . . ? 
C22 Fe1 C27 110.8(4) . . ? 
C21 Fe1 C27 142.1(4) . . ? 
C25 Fe1 C27 174.2(4) . . ? 
C26 Fe1 C27 41.3(4) . . ? 
C30 Fe1 C27 68.6(4) . . ? 
C28 Fe1 C27 40.8(4) . . ? 
C22 Fe1 C24 68.5(5) . . ? 
C21 Fe1 C24 69.0(4) . . ? 
C25 Fe1 C24 40.4(5) . . ? 
C26 Fe1 C24 173.3(4) . . ? 
C30 Fe1 C24 145.4(4) . . ? 
C28 Fe1 C24 110.4(5) . . ? 
C27 Fe1 C24 133.9(4) . . ? 
C22 Fe1 C23 40.9(4) . . ? 
C21 Fe1 C23 69.3(4) . . ? 
C25 Fe1 C23 68.5(5) . . ? 
C26 Fe1 C23 133.3(4) . . ? 
C30 Fe1 C23 174.2(4) . . ? 
C28 Fe1 C23 112.6(4) . . ? 
C27 Fe1 C23 107.7(4) . . ? 
C24 Fe1 C23 40.3(5) . . ? 
C22 Fe1 C29 175.2(4) . . ? 
C21 Fe1 C29 136.3(4) . . ? 
C25 Fe1 C29 111.8(4) . . ? 
C26 Fe1 C29 68.5(4) . . ? 
C30 Fe1 C29 39.9(4) . . ? 
C28 Fe1 C29 40.5(4) . . ? 
C27 Fe1 C29 68.5(4) . . ? 
C24 Fe1 C29 115.6(5) . . ? 
C23 Fe1 C29 143.9(4) . . ? 
C30 C26 C27 107.1(8) . . ? 
C30 C26 P2 124.5(7) . . ? 
C27 C26 P2 128.2(8) . . ? 
C30 C26 Fe1 69.8(6) . . ? 
C27 C26 Fe1 69.8(6) . . ? 
P2 C26 Fe1 121.1(5) . . ? 
C28 C27 C26 107.2(9) . . ? 
C28 C27 Fe1 69.5(6) . . ? 
C26 C27 Fe1 68.9(6) . . ? 
C28 C27 H21 126.4 . . ? 
C26 C27 H21 126.4 . . ? 
Fe1 C27 H21 126.8 . . ? 
C29 C28 C27 108.6(9) . . ? 
C29 C28 Fe1 70.5(6) . . ? 
C27 C28 Fe1 69.8(6) . . ? 
C29 C28 H22 125.7 . . ? 
C27 C28 H22 125.7 . . ? 
Fe1 C28 H22 125.7 . . ? 
C30 C29 C28 107.8(9) . . ? 
C30 C29 Fe1 69.3(6) . . ? 
C28 C29 Fe1 69.0(6) . . ? 
C30 C29 H23 126.1 . . ? 
C28 C29 H23 126.1 . . ? 
Fe1 C29 H23 127.1 . . ? 
C29 C30 C26 109.2(9) . . ? 
C29 C30 Fe1 70.8(6) . . ? 
C26 C30 Fe1 69.2(5) . . ? 
C29 C30 H24 125.4 . . ? 
C26 C30 H24 125.4 . . ? 
Fe1 C30 H24 126.2 . . ? 
C26 P2 C43 103.8(4) . . ? 
C26 P2 C49 103.3(5) . . ? 
C43 P2 C49 102.3(4) . . ? 
C26 P2 Pt1 122.4(3) . . ? 
C43 P2 Pt1 111.6(3) . . ? 
C49 P2 Pt1 111.3(3) . . ? 
C32 C31 C36 119.0(9) . . ? 
C32 C31 P1 121.0(8) . . ? 
C36 C31 P1 119.3(7) . . ? 
C33 C32 C31 121.7(11) . . ? 
C33 C32 H25 119.2 . . ? 
C31 C32 H25 119.2 . . ? 
C32 C33 C34 118.6(11) . . ? 
C32 C33 H26 120.7 . . ? 
C34 C33 H26 120.7 . . ? 
C35 C34 C33 120.5(11) . . ? 
C35 C34 H27 119.7 . . ? 
C33 C34 H27 119.7 . . ? 
C34 C35 C36 120.6(12) . . ? 
C34 C35 H28 119.7 . . ? 
C36 C35 H28 119.7 . . ? 
C31 C36 C35 119.5(10) . . ? 
C31 C36 H29 120.2 . . ? 
C35 C36 H29 120.2 . . ? 
C38 C37 C42 120.0(9) . . ? 
C38 C37 P1 122.3(8) . . ? 
C42 C37 P1 117.6(7) . . ? 
C37 C38 C39 119.7(9) . . ? 
C37 C38 H30 120.2 . . ? 
C39 C38 H30 120.2 . . ? 
C40 C39 C38 120.4(9) . . ? 
C40 C39 H31 119.8 . . ? 
C38 C39 H31 119.8 . . ? 
C39 C40 C41 120.6(9) . . ? 
C39 C40 H32 119.7 . . ? 
C41 C40 H32 119.7 . . ? 
C40 C41 C42 118.9(9) . . ? 
C40 C41 H33 120.5 . . ? 
C42 C41 H33 120.5 . . ? 
C37 C42 C41 120.3(9) . . ? 
C37 C42 H34 119.9 . . ? 
C41 C42 H34 119.9 . . ? 
C44 C43 C48 118.2(9) . . ? 
C44 C43 P2 119.2(7) . . ? 
C48 C43 P2 122.5(7) . . ? 
C45 C44 C43 121.1(9) . . ? 
C45 C44 H35 119.5 . . ? 
C43 C44 H35 119.5 . . ? 
C44 C45 C46 119.2(10) . . ? 
C44 C45 H36 120.4 . . ? 
C46 C45 H36 120.4 . . ? 
C47 C46 C45 120.1(10) . . ? 
C47 C46 H37 120.0 . . ? 
C45 C46 H37 120.0 . . ? 
C48 C47 C46 120.1(10) . . ? 
C48 C47 H38 120.0 . . ? 
C46 C47 H38 120.0 . . ? 
C47 C48 C43 121.3(9) . . ? 
C47 C48 H39 119.4 . . ? 
C43 C48 H39 119.4 . . ? 
C50 C49 C54 119.2(9) . . ? 
C50 C49 P2 118.2(7) . . ? 
C54 C49 P2 122.6(8) . . ? 
C49 C50 C51 121.2(9) . . ? 
C49 C50 H40 119.4 . . ? 
C51 C50 H40 119.4 . . ? 
C52 C51 C50 119.4(10) . . ? 
C52 C51 H41 120.3 . . ? 
C50 C51 H41 120.3 . . ? 
C53 C52 C51 119.7(10) . . ? 
C53 C52 H42 120.1 . . ? 
C51 C52 H42 120.1 . . ? 
C52 C53 C54 122.2(12) . . ? 
C52 C53 H43 118.9 . . ? 
C54 C53 H43 118.9 . . ? 
C49 C54 C53 118.2(10) . . ? 
C49 C54 H44 120.9 . . ? 
C53 C54 H44 120.9 . . ? 
Cl2 C55 Cl1 111.0(6) . . ? 
Cl2 C55 H45 109.4 . . ? 
Cl1 C55 H45 109.4 . . ? 
Cl2 C55 H46 109.4 . . ? 
Cl1 C55 H46 109.4 . . ? 
H45 C55 H46 108.0 . . ? 
 
_diffrn_measured_fraction_theta_max    1.000 
_diffrn_reflns_theta_full              25.50 
_diffrn_measured_fraction_theta_full   1.000 
_refine_diff_density_max    1.772 
_refine_diff_density_min   -0.677 
_refine_diff_density_rms    0.131 
