# Supplementary material
Source: MDPI journal article supplement (https://www.mdpi.com/2304-6740/5/4/72)
Supplement: s1 [file s1 › NAKA171.CIF]

 
data_naka171 
 
_audit_creation_method            SHELXL-97 
_chemical_name_systematic 
; 
'C41 H40 P2 Pt Si, C H2 Cl2' 
; 
_chemical_name_common             ? 
_chemical_melting_point           ? 
_chemical_formula_moiety          'C41 H40 P2 Pt Si, C H2 Cl2'  
_chemical_formula_sum 
 'C42 H42 Cl2 P2 Pt Si' 
_chemical_formula_weight          902.78 
 
loop_ 
 _atom_type_symbol 
 _atom_type_description 
 _atom_type_scat_dispersion_real 
 _atom_type_scat_dispersion_imag 
 _atom_type_scat_source 
 'C'  'C'   0.0033   0.0016 
 'International Tables Vol C Tables 4.2.6.8 and 6.1.1.4' 
 'H'  'H'   0.0000   0.0000 
 'International Tables Vol C Tables 4.2.6.8 and 6.1.1.4' 
 'Si'  'Si'   0.0817   0.0704 
 'International Tables Vol C Tables 4.2.6.8 and 6.1.1.4' 
 'P'  'P'   0.1023   0.0942 
 'International Tables Vol C Tables 4.2.6.8 and 6.1.1.4' 
 'Cl'  'Cl'   0.1484   0.1585 
 'International Tables Vol C Tables 4.2.6.8 and 6.1.1.4' 
 'Pt'  'Pt'  -1.7033   8.3905 
 'International Tables Vol C Tables 4.2.6.8 and 6.1.1.4' 
 
_symmetry_cell_setting            'orthorhombic'
_symmetry_space_group_name_H-M    'P b c a'
_symmetry_space_group_name_Hall       '-P 2ac 2ab'
_symmetry_Int_Tables_number            61
 
loop_ 
 _symmetry_equiv_pos_as_xyz 
 'x, y, z' 
 '-x+1/2, -y, z+1/2' 
 'x+1/2, -y+1/2, -z' 
 '-x, y+1/2, -z+1/2' 
 '-x, -y, -z' 
 'x-1/2, y, -z-1/2' 
 '-x-1/2, y-1/2, z' 
 'x, -y-1/2, z-1/2' 
 
_cell_length_a                    15.9074(6) 
_cell_length_b                    20.9224(8) 
_cell_length_c                    22.6113(9) 
_cell_angle_alpha                 90.00 
_cell_angle_beta                  90.00 
_cell_angle_gamma                 90.00 
_cell_volume                      7525.5(5) 
_cell_formula_units_Z             8 
_cell_measurement_temperature     103(2) 
_cell_measurement_reflns_used     8704
_cell_measurement_theta_min       2.21
_cell_measurement_theta_max       27.69
 
_exptl_crystal_description        'prism'
_exptl_crystal_colour             'colorless'
_exptl_crystal_size_max           0.29 
_exptl_crystal_size_mid           0.11 
_exptl_crystal_size_min           0.07 
_exptl_crystal_density_meas       'not measured' 
_exptl_crystal_density_diffrn     1.594 
_exptl_crystal_density_method     'not measured' 
_exptl_crystal_F_000              3600 
_exptl_absorpt_coefficient_mu     4.018 
_exptl_absorpt_correction_type    'empirical'  
_exptl_absorpt_correction_T_min   0.3887 
_exptl_absorpt_correction_T_max   0.7662 
_exptl_absorpt_process_details    'SADABS (Sheldrick, 1997)' 
 
_exptl_special_details 
; 
 ? 
; 
 
_diffrn_ambient_temperature       103(2) 
_diffrn_radiation_wavelength      0.71073 
_diffrn_radiation_type            MoK\a 
_diffrn_radiation_source          'fine-focus sealed tube' 
_diffrn_radiation_monochromator   graphite 
_diffrn_measurement_device_type   'CCD area detector'
_diffrn_measurement_method        'phi and omega scans' 
_diffrn_detector_area_resol_mean  ? 
_diffrn_standards_number          ? 
_diffrn_standards_interval_count  ? 
_diffrn_standards_interval_time   ? 
_diffrn_standards_decay_%         ? 
_diffrn_reflns_number             43981 
_diffrn_reflns_av_R_equivalents   0.0539 
_diffrn_reflns_av_sigmaI/netI     0.0365 
_diffrn_reflns_limit_h_min        -19 
_diffrn_reflns_limit_h_max        19 
_diffrn_reflns_limit_k_min        -25 
_diffrn_reflns_limit_k_max        21 
_diffrn_reflns_limit_l_min        -27 
_diffrn_reflns_limit_l_max        27 
_diffrn_reflns_theta_min          1.80 
_diffrn_reflns_theta_max          25.50 
_reflns_number_total              7011 
_reflns_number_gt                 5562 
_reflns_threshold_expression      >2sigma(I) 
 
_computing_data_collection        'Bruker SMART'
_computing_cell_refinement        'Bruker SAINT'
_computing_data_reduction         'Bruker SAINT' 
_computing_structure_solution     'SHELXS-97 (Sheldrick, 1990)' 
_computing_structure_refinement   'SHELXL-97 (Sheldrick, 1997)' 
_computing_molecular_graphics 'Yadokari-XG 2009 (Wakita, Nemoto et al., 2009)'
_computing_publication_material 'Yadokari-XG 2009 (Wakita, Nemoto et al., 2009)'
_publ_section_references
;
Wakita, K. (2001). Yadokari-XG. Software for Crystal Structure Analyses.
Release of Software (Yadokari-XG 2009) for Crystal Structure Analyses,
Kabuto, C., Akine, S., Nemoto, T. & Kwon, E. (2009). J. Cryst. Soc. Jpn.,51,
218-224.
;  
 
_refine_special_details 
; 
 Refinement of F^2^ against ALL reflections.  The weighted R-factor wR and 
 goodness of fit S are based on F^2^, conventional R-factors R are based 
 on F, with F set to zero for negative F^2^. The threshold expression of 
 F^2^ > 2sigma(F^2^) is used only for calculating R-factors(gt) etc. and is 
 not relevant to the choice of reflections for refinement.  R-factors based 
 on F^2^ are statistically about twice as large as those based on F, and R- 
 factors based on ALL data will be even larger. 
; 
 
_refine_ls_structure_factor_coef  Fsqd  
_refine_ls_matrix_type            full 
_refine_ls_weighting_scheme       calc  
_refine_ls_weighting_details 
 'calc w=1/[\s^2^(Fo^2^)+(0.0306P)^2^+24.9781P] where P=(Fo^2^+2Fc^2^)/3' 
_atom_sites_solution_primary      direct 
_atom_sites_solution_secondary    difmap 
_atom_sites_solution_hydrogens    geom 
_refine_ls_hydrogen_treatment     mixed 
_refine_ls_extinction_method      none 
_refine_ls_extinction_coef        ? 
_refine_ls_number_reflns          7011 
_refine_ls_number_parameters      448 
_refine_ls_number_restraints      0 
_refine_ls_R_factor_all           0.0465 
_refine_ls_R_factor_gt            0.0325 
_refine_ls_wR_factor_ref          0.0783 
_refine_ls_wR_factor_gt           0.0706 
_refine_ls_goodness_of_fit_ref    1.026 
_refine_ls_restrained_S_all       1.026 
_refine_ls_shift/su_max           0.000 
_refine_ls_shift/su_mean          0.000 
 
loop_ 
 _atom_site_label 
 _atom_site_type_symbol 
 _atom_site_fract_x 
 _atom_site_fract_y 
 _atom_site_fract_z 
 _atom_site_U_iso_or_equiv 
 _atom_site_adp_type 
 _atom_site_occupancy 
 _atom_site_symmetry_multiplicity 
 _atom_site_calc_flag 
 _atom_site_refinement_flags 
 _atom_site_disorder_assembly 
 _atom_site_disorder_group 
Pt1 Pt 0.202957(10) 0.127212(8) 0.221313(7) 0.01507(7) Uani 1 1 d . . . 
H1 H 0.132(4) 0.106(3) 0.256(3) 0.046(17) Uiso 1 1 d . . . 
Si1 Si 0.25455(8) 0.12000(7) 0.31806(6) 0.0190(3) Uani 1 1 d . . . 
H2 H 0.288(3) 0.060(2) 0.329(2) 0.015(12) Uiso 1 1 d . . . 
H3 H 0.323(3) 0.159(3) 0.332(2) 0.043(16) Uiso 1 1 d . . . 
C1 C 0.1781(3) 0.1351(2) 0.38286(19) 0.0161(10) Uani 1 1 d . . . 
C2 C 0.2194(3) 0.1368(2) 0.4447(2) 0.0175(10) Uani 1 1 d . . . 
C3 C 0.3028(3) 0.1239(2) 0.4574(2) 0.0205(10) Uani 1 1 d . . . 
H4 H 0.3409 0.1134 0.4265 0.025 Uiso 1 1 calc R . . 
C4 C 0.3309(3) 0.1262(2) 0.5166(2) 0.0223(10) Uani 1 1 d . . . 
H5 H 0.3879 0.1169 0.5255 0.027 Uiso 1 1 calc R . . 
C5 C 0.2762(3) 0.1419(2) 0.5611(2) 0.0250(11) Uani 1 1 d . . . 
H6 H 0.2960 0.1450 0.6007 0.030 Uiso 1 1 calc R . . 
C6 C 0.1915(3) 0.1535(2) 0.5488(2) 0.0246(11) Uani 1 1 d . . . 
H7 H 0.1533 0.1632 0.5798 0.030 Uiso 1 1 calc R . . 
C7 C 0.1639(3) 0.1506(2) 0.4909(2) 0.0178(10) Uani 1 1 d . . . 
C8 C 0.1075(3) 0.0853(2) 0.3905(2) 0.0176(10) Uani 1 1 d . . . 
C9 C 0.0968(3) 0.0292(2) 0.3587(2) 0.0184(10) Uani 1 1 d . . . 
H8 H 0.1356 0.0182 0.3285 0.022 Uiso 1 1 calc R . . 
C10 C 0.0293(3) -0.0109(2) 0.3712(2) 0.0253(11) Uani 1 1 d . . . 
H9 H 0.0219 -0.0489 0.3488 0.030 Uiso 1 1 calc R . . 
C11 C -0.0273(3) 0.0040(2) 0.4157(2) 0.0269(12) Uani 1 1 d . . . 
H10 H -0.0737 -0.0233 0.4234 0.032 Uiso 1 1 calc R . . 
C12 C -0.0154(3) 0.0592(2) 0.4490(2) 0.0220(11) Uani 1 1 d . . . 
H11 H -0.0532 0.0694 0.4801 0.026 Uiso 1 1 calc R . . 
C13 C 0.0515(3) 0.0992(2) 0.4366(2) 0.0183(10) Uani 1 1 d . . . 
C14 C 0.1322(3) 0.1997(2) 0.3779(2) 0.0168(10) Uani 1 1 d . . . 
C15 C 0.1405(3) 0.2443(2) 0.3326(2) 0.0192(10) Uani 1 1 d . . . 
H12 H 0.1788 0.2368 0.3012 0.023 Uiso 1 1 calc R . . 
C16 C 0.0922(3) 0.3001(2) 0.3335(2) 0.0236(11) Uani 1 1 d . . . 
H13 H 0.0981 0.3305 0.3026 0.028 Uiso 1 1 calc R . . 
C17 C 0.0358(3) 0.3113(2) 0.3791(2) 0.0230(11) Uani 1 1 d . . . 
H14 H 0.0023 0.3489 0.3789 0.028 Uiso 1 1 calc R . . 
C18 C 0.0282(3) 0.2676(2) 0.4251(2) 0.0192(10) Uani 1 1 d . . . 
H15 H -0.0096 0.2755 0.4568 0.023 Uiso 1 1 calc R . . 
C19 C 0.0761(3) 0.2127(2) 0.42428(19) 0.0178(10) Uani 1 1 d . . . 
C20 C 0.0739(3) 0.1597(2) 0.4704(2) 0.0192(10) Uani 1 1 d . . . 
H16 H 0.0342 0.1689 0.5037 0.023 Uiso 1 1 calc R . . 
P1 P 0.32681(8) 0.16977(6) 0.18690(5) 0.0183(3) Uani 1 1 d . . . 
C21 C 0.3423(3) 0.2500(3) 0.2152(2) 0.0308(12) Uani 1 1 d . . . 
H17 H 0.3444 0.2488 0.2585 0.046 Uiso 1 1 calc R . . 
H18 H 0.2956 0.2773 0.2026 0.046 Uiso 1 1 calc R . . 
H19 H 0.3952 0.2673 0.1999 0.046 Uiso 1 1 calc R . . 
C22 C 0.4221(3) 0.1292(3) 0.2087(2) 0.0289(12) Uani 1 1 d . . . 
H20 H 0.4710 0.1540 0.1956 0.043 Uiso 1 1 calc R . . 
H21 H 0.4238 0.0867 0.1905 0.043 Uiso 1 1 calc R . . 
H22 H 0.4234 0.1248 0.2519 0.043 Uiso 1 1 calc R . . 
C23 C 0.3432(3) 0.1822(3) 0.1085(2) 0.0272(12) Uani 1 1 d . . . 
H23 H 0.3005 0.2116 0.0933 0.041 Uiso 1 1 calc R . . 
H24 H 0.3389 0.1412 0.0877 0.041 Uiso 1 1 calc R . . 
H25 H 0.3992 0.2004 0.1020 0.041 Uiso 1 1 calc R . . 
P2 P 0.11940(7) 0.12185(6) 0.13735(5) 0.0152(2) Uani 1 1 d . . . 
C24 C 0.0424(3) 0.0562(2) 0.1351(2) 0.0164(10) Uani 1 1 d . . . 
C25 C 0.0037(3) 0.0388(2) 0.0818(2) 0.0219(11) Uani 1 1 d . . . 
H26 H 0.0210 0.0582 0.0459 0.026 Uiso 1 1 calc R . . 
C26 C -0.0595(3) -0.0065(2) 0.0814(2) 0.0231(11) Uani 1 1 d . . . 
H27 H -0.0854 -0.0181 0.0451 0.028 Uiso 1 1 calc R . . 
C27 C -0.0854(3) -0.0352(2) 0.1334(2) 0.0235(11) Uani 1 1 d . . . 
H28 H -0.1301 -0.0653 0.1329 0.028 Uiso 1 1 calc R . . 
C28 C -0.0460(3) -0.0197(2) 0.1860(2) 0.0252(11) Uani 1 1 d . . . 
H29 H -0.0624 -0.0401 0.2217 0.030 Uiso 1 1 calc R . . 
C29 C 0.0174(3) 0.0255(2) 0.1864(2) 0.0198(10) Uani 1 1 d . . . 
H30 H 0.0444 0.0357 0.2226 0.024 Uiso 1 1 calc R . . 
C30 C 0.0536(3) 0.1930(2) 0.13049(19) 0.0166(10) Uani 1 1 d . . . 
C31 C -0.0103(3) 0.1992(2) 0.0879(2) 0.0199(10) Uani 1 1 d . . . 
H31 H -0.0187 0.1659 0.0600 0.024 Uiso 1 1 calc R . . 
C32 C -0.0611(3) 0.2526(2) 0.0858(2) 0.0236(11) Uani 1 1 d . . . 
H32 H -0.1037 0.2560 0.0565 0.028 Uiso 1 1 calc R . . 
C33 C -0.0497(3) 0.3013(2) 0.1265(2) 0.0272(12) Uani 1 1 d . . . 
H33 H -0.0848 0.3380 0.1253 0.033 Uiso 1 1 calc R . . 
C34 C 0.0130(3) 0.2965(2) 0.1690(2) 0.0310(12) Uani 1 1 d . . . 
H34 H 0.0210 0.3299 0.1969 0.037 Uiso 1 1 calc R . . 
C35 C 0.0638(3) 0.2426(2) 0.1705(2) 0.0249(11) Uani 1 1 d . . . 
H35 H 0.1067 0.2397 0.1997 0.030 Uiso 1 1 calc R . . 
C36 C 0.1701(3) 0.1114(2) 0.06517(19) 0.0169(10) Uani 1 1 d . . . 
C37 C 0.2129(3) 0.0542(2) 0.0556(2) 0.0208(10) Uani 1 1 d . . . 
H36 H 0.2117 0.0218 0.0851 0.025 Uiso 1 1 calc R . . 
C38 C 0.2572(3) 0.0440(3) 0.0039(2) 0.0256(12) Uani 1 1 d . . . 
H37 H 0.2854 0.0045 -0.0022 0.031 Uiso 1 1 calc R . . 
C39 C 0.2605(3) 0.0913(3) -0.0393(2) 0.0288(12) Uani 1 1 d . . . 
H38 H 0.2912 0.0846 -0.0748 0.035 Uiso 1 1 calc R . . 
C40 C 0.2184(3) 0.1485(3) -0.0298(2) 0.0265(12) Uani 1 1 d . . . 
H39 H 0.2205 0.1813 -0.0589 0.032 Uiso 1 1 calc R . . 
C41 C 0.1730(3) 0.1581(2) 0.0221(2) 0.0216(11) Uani 1 1 d . . . 
H40 H 0.1437 0.1972 0.0279 0.026 Uiso 1 1 calc R . . 
C42 C 0.2287(5) -0.0459(3) 0.2244(3) 0.065(2) Uani 1 1 d . . . 
H41 H 0.2358 -0.0030 0.2421 0.078 Uiso 1 1 calc R . . 
H42 H 0.1803 -0.0439 0.1970 0.078 Uiso 1 1 calc R . . 
Cl1 Cl 0.31792(11) -0.06458(13) 0.18463(8) 0.0824(8) Uani 1 1 d . . . 
Cl2 Cl 0.20658(18) -0.09897(9) 0.27898(10) 0.0890(8) Uani 1 1 d . . . 
 
loop_ 
 _atom_site_aniso_label 
 _atom_site_aniso_U_11 
 _atom_site_aniso_U_22 
 _atom_site_aniso_U_33 
 _atom_site_aniso_U_23 
 _atom_site_aniso_U_13 
 _atom_site_aniso_U_12 
Pt1 0.01445(10) 0.01804(10) 0.01273(10) -0.00122(7) -0.00023(7) 0.00021(7) 
Si1 0.0172(6) 0.0254(7) 0.0143(6) -0.0013(6) -0.0009(5) 0.0018(5) 
C1 0.014(2) 0.021(2) 0.014(2) 0.0000(19) -0.0014(18) -0.0012(18) 
C2 0.023(3) 0.015(2) 0.014(2) 0.0023(18) -0.0028(19) -0.0040(19) 
C3 0.024(3) 0.019(2) 0.018(2) 0.002(2) 0.002(2) -0.004(2) 
C4 0.021(2) 0.025(3) 0.022(2) 0.005(2) -0.003(2) -0.004(2) 
C5 0.031(3) 0.025(3) 0.019(3) 0.002(2) -0.011(2) -0.005(2) 
C6 0.037(3) 0.021(3) 0.016(2) -0.001(2) 0.002(2) 0.001(2) 
C7 0.018(2) 0.016(2) 0.020(2) 0.0002(19) -0.001(2) -0.0004(19) 
C8 0.018(2) 0.017(2) 0.018(2) 0.0051(19) -0.0034(19) -0.0007(19) 
C9 0.019(2) 0.016(2) 0.020(2) 0.0005(19) -0.002(2) 0.0034(19) 
C10 0.033(3) 0.014(2) 0.029(3) -0.003(2) -0.007(2) -0.001(2) 
C11 0.027(3) 0.021(3) 0.033(3) 0.009(2) -0.005(2) -0.008(2) 
C12 0.022(2) 0.025(3) 0.020(2) 0.005(2) -0.001(2) 0.000(2) 
C13 0.018(2) 0.019(2) 0.018(2) 0.0022(19) -0.0037(19) 0.0007(19) 
C14 0.015(2) 0.017(2) 0.018(2) -0.0015(19) -0.0051(19) 0.0015(18) 
C15 0.023(2) 0.021(2) 0.013(2) -0.0026(19) 0.000(2) -0.002(2) 
C16 0.032(3) 0.016(2) 0.024(3) 0.002(2) -0.009(2) -0.005(2) 
C17 0.021(2) 0.018(2) 0.029(3) -0.003(2) -0.006(2) 0.000(2) 
C18 0.019(2) 0.020(3) 0.019(2) -0.005(2) -0.001(2) -0.003(2) 
C19 0.020(2) 0.020(2) 0.014(2) -0.0017(19) -0.0047(19) -0.002(2) 
C20 0.023(2) 0.021(3) 0.014(2) 0.0002(19) 0.002(2) 0.005(2) 
P1 0.0162(6) 0.0211(6) 0.0177(6) -0.0009(5) 0.0005(5) -0.0020(5) 
C21 0.032(3) 0.030(3) 0.030(3) -0.006(2) 0.002(2) -0.008(2) 
C22 0.016(2) 0.043(3) 0.028(3) 0.001(2) 0.000(2) 0.008(2) 
C23 0.022(3) 0.035(3) 0.024(3) 0.005(2) 0.006(2) -0.009(2) 
P2 0.0158(6) 0.0169(6) 0.0129(5) 0.0001(5) -0.0002(4) -0.0006(5) 
C24 0.017(2) 0.013(2) 0.020(2) -0.0035(19) -0.0016(19) 0.0010(18) 
C25 0.023(3) 0.025(3) 0.018(2) 0.000(2) 0.001(2) 0.001(2) 
C26 0.019(2) 0.020(3) 0.031(3) -0.006(2) -0.001(2) 0.000(2) 
C27 0.018(2) 0.017(2) 0.036(3) -0.005(2) 0.001(2) -0.002(2) 
C28 0.027(3) 0.023(3) 0.025(3) 0.002(2) 0.007(2) -0.002(2) 
C29 0.022(2) 0.017(2) 0.021(3) 0.001(2) 0.000(2) 0.000(2) 
C30 0.019(2) 0.016(2) 0.015(2) 0.0026(19) 0.0060(19) -0.0017(19) 
C31 0.021(2) 0.019(3) 0.019(2) -0.002(2) -0.001(2) -0.002(2) 
C32 0.021(2) 0.023(3) 0.026(3) 0.004(2) 0.000(2) -0.001(2) 
C33 0.029(3) 0.021(3) 0.032(3) 0.005(2) 0.005(2) 0.005(2) 
C34 0.043(3) 0.020(3) 0.030(3) -0.007(2) -0.006(3) 0.002(2) 
C35 0.027(3) 0.023(3) 0.025(3) -0.003(2) -0.004(2) 0.000(2) 
C36 0.012(2) 0.027(3) 0.012(2) -0.0039(19) -0.0013(18) -0.0026(19) 
C37 0.022(3) 0.022(3) 0.018(2) -0.001(2) -0.005(2) -0.002(2) 
C38 0.021(3) 0.028(3) 0.027(3) -0.012(2) 0.002(2) 0.000(2) 
C39 0.020(3) 0.049(4) 0.018(3) -0.010(3) 0.003(2) -0.004(2) 
C40 0.020(3) 0.045(3) 0.015(2) 0.007(2) 0.003(2) -0.004(2) 
C41 0.018(2) 0.030(3) 0.017(2) 0.000(2) -0.004(2) 0.001(2) 
C42 0.074(5) 0.040(4) 0.082(6) 0.009(4) 0.035(4) 0.018(4) 
Cl1 0.0337(9) 0.168(2) 0.0450(10) -0.0533(13) 0.0014(8) -0.0025(11) 
Cl2 0.154(2) 0.0331(9) 0.0798(15) -0.0086(9) 0.0523(15) -0.0077(12) 
 
_geom_special_details 
; 
 All esds (except the esd in the dihedral angle between two l.s. planes) 
 are estimated using the full covariance matrix.  The cell esds are taken 
 into account individually in the estimation of esds in distances, angles 
 and torsion angles; correlations between esds in cell parameters are only 
 used when they are defined by crystal symmetry.  An approximate (isotropic) 
 treatment of cell esds is used for estimating esds involving l.s. planes. 
; 
 
loop_ 
 _geom_bond_atom_site_label_1 
 _geom_bond_atom_site_label_2 
 _geom_bond_distance 
 _geom_bond_site_symmetry_2 
 _geom_bond_publ_flag 
Pt1 P1 2.2978(12) . ? 
Pt1 P2 2.3203(11) . ? 
Pt1 Si1 2.3414(13) . ? 
Pt1 H1 1.44(6) . ? 
Si1 C1 1.930(5) . ? 
Si1 H2 1.39(4) . ? 
Si1 H3 1.39(6) . ? 
C1 C14 1.540(6) . ? 
C1 C8 1.542(6) . ? 
C1 C2 1.545(6) . ? 
C2 C3 1.384(6) . ? 
C2 C7 1.400(7) . ? 
C3 C4 1.410(6) . ? 
C3 H4 0.9500 . ? 
C4 C5 1.372(7) . ? 
C4 H5 0.9500 . ? 
C5 C6 1.397(7) . ? 
C5 H6 0.9500 . ? 
C6 C7 1.381(7) . ? 
C6 H7 0.9500 . ? 
C7 C20 1.517(6) . ? 
C8 C9 1.386(6) . ? 
C8 C13 1.400(6) . ? 
C9 C10 1.391(7) . ? 
C9 H8 0.9500 . ? 
C10 C11 1.385(7) . ? 
C10 H9 0.9500 . ? 
C11 C12 1.393(7) . ? 
C11 H10 0.9500 . ? 
C12 C13 1.382(7) . ? 
C12 H11 0.9500 . ? 
C13 C20 1.523(6) . ? 
C14 C15 1.392(6) . ? 
C14 C19 1.403(6) . ? 
C15 C16 1.397(7) . ? 
C15 H12 0.9500 . ? 
C16 C17 1.387(7) . ? 
C16 H13 0.9500 . ? 
C17 C18 1.391(7) . ? 
C17 H14 0.9500 . ? 
C18 C19 1.377(6) . ? 
C18 H15 0.9500 . ? 
C19 C20 1.523(6) . ? 
C20 H16 1.0000 . ? 
P1 C22 1.807(5) . ? 
P1 C23 1.811(5) . ? 
P1 C21 1.813(5) . ? 
C21 H17 0.9800 . ? 
C21 H18 0.9800 . ? 
C21 H19 0.9800 . ? 
C22 H20 0.9800 . ? 
C22 H21 0.9800 . ? 
C22 H22 0.9800 . ? 
C23 H23 0.9800 . ? 
C23 H24 0.9800 . ? 
C23 H25 0.9800 . ? 
P2 C30 1.828(5) . ? 
P2 C36 1.834(4) . ? 
P2 C24 1.841(5) . ? 
C24 C29 1.383(6) . ? 
C24 C25 1.402(6) . ? 
C25 C26 1.381(7) . ? 
C25 H26 0.9500 . ? 
C26 C27 1.382(7) . ? 
C26 H27 0.9500 . ? 
C27 C28 1.383(7) . ? 
C27 H28 0.9500 . ? 
C28 C29 1.384(7) . ? 
C28 H29 0.9500 . ? 
C29 H30 0.9500 . ? 
C30 C35 1.387(6) . ? 
C30 C31 1.406(6) . ? 
C31 C32 1.379(7) . ? 
C31 H31 0.9500 . ? 
C32 C33 1.384(7) . ? 
C32 H32 0.9500 . ? 
C33 C34 1.389(7) . ? 
C33 H33 0.9500 . ? 
C34 C35 1.387(7) . ? 
C34 H34 0.9500 . ? 
C35 H35 0.9500 . ? 
C36 C41 1.381(7) . ? 
C36 C37 1.394(7) . ? 
C37 C38 1.382(7) . ? 
C37 H36 0.9500 . ? 
C38 C39 1.393(8) . ? 
C38 H37 0.9500 . ? 
C39 C40 1.388(8) . ? 
C39 H38 0.9500 . ? 
C40 C41 1.393(7) . ? 
C40 H39 0.9500 . ? 
C41 H40 0.9500 . ? 
C42 Cl2 1.697(7) . ? 
C42 Cl1 1.726(7) . ? 
C42 H41 0.9900 . ? 
C42 H42 0.9900 . ? 
 
loop_ 
 _geom_angle_atom_site_label_1 
 _geom_angle_atom_site_label_2 
 _geom_angle_atom_site_label_3 
 _geom_angle 
 _geom_angle_site_symmetry_1 
 _geom_angle_site_symmetry_3 
 _geom_angle_publ_flag 
P1 Pt1 P2 103.47(4) . . ? 
P1 Pt1 Si1 92.34(4) . . ? 
P2 Pt1 Si1 164.19(4) . . ? 
P1 Pt1 H1 167(2) . . ? 
P2 Pt1 H1 89(2) . . ? 
Si1 Pt1 H1 75(2) . . ? 
C1 Si1 Pt1 118.55(14) . . ? 
C1 Si1 H2 104.8(18) . . ? 
Pt1 Si1 H2 111.1(18) . . ? 
C1 Si1 H3 103(2) . . ? 
Pt1 Si1 H3 116(2) . . ? 
H2 Si1 H3 101(3) . . ? 
C14 C1 C8 104.8(3) . . ? 
C14 C1 C2 104.3(4) . . ? 
C8 C1 C2 102.9(3) . . ? 
C14 C1 Si1 112.8(3) . . ? 
C8 C1 Si1 115.7(3) . . ? 
C2 C1 Si1 115.0(3) . . ? 
C3 C2 C7 119.3(4) . . ? 
C3 C2 C1 126.3(4) . . ? 
C7 C2 C1 114.4(4) . . ? 
C2 C3 C4 119.6(4) . . ? 
C2 C3 H4 120.2 . . ? 
C4 C3 H4 120.2 . . ? 
C5 C4 C3 120.3(4) . . ? 
C5 C4 H5 119.9 . . ? 
C3 C4 H5 119.9 . . ? 
C4 C5 C6 120.5(5) . . ? 
C4 C5 H6 119.8 . . ? 
C6 C5 H6 119.8 . . ? 
C7 C6 C5 119.2(5) . . ? 
C7 C6 H7 120.4 . . ? 
C5 C6 H7 120.4 . . ? 
C6 C7 C2 121.1(4) . . ? 
C6 C7 C20 125.7(4) . . ? 
C2 C7 C20 113.1(4) . . ? 
C9 C8 C13 118.9(4) . . ? 
C9 C8 C1 127.1(4) . . ? 
C13 C8 C1 114.0(4) . . ? 
C8 C9 C10 120.0(4) . . ? 
C8 C9 H8 120.0 . . ? 
C10 C9 H8 120.0 . . ? 
C11 C10 C9 120.8(5) . . ? 
C11 C10 H9 119.6 . . ? 
C9 C10 H9 119.6 . . ? 
C10 C11 C12 119.4(5) . . ? 
C10 C11 H10 120.3 . . ? 
C12 C11 H10 120.3 . . ? 
C13 C12 C11 119.8(5) . . ? 
C13 C12 H11 120.1 . . ? 
C11 C12 H11 120.1 . . ? 
C12 C13 C8 121.0(4) . . ? 
C12 C13 C20 125.6(4) . . ? 
C8 C13 C20 113.4(4) . . ? 
C15 C14 C19 118.6(4) . . ? 
C15 C14 C1 126.6(4) . . ? 
C19 C14 C1 114.7(4) . . ? 
C14 C15 C16 119.9(4) . . ? 
C14 C15 H12 120.0 . . ? 
C16 C15 H12 120.0 . . ? 
C17 C16 C15 120.4(5) . . ? 
C17 C16 H13 119.8 . . ? 
C15 C16 H13 119.8 . . ? 
C16 C17 C18 120.1(4) . . ? 
C16 C17 H14 120.0 . . ? 
C18 C17 H14 120.0 . . ? 
C19 C18 C17 119.3(4) . . ? 
C19 C18 H15 120.3 . . ? 
C17 C18 H15 120.3 . . ? 
C18 C19 C14 121.6(4) . . ? 
C18 C19 C20 125.8(4) . . ? 
C14 C19 C20 112.6(4) . . ? 
C7 C20 C13 105.6(4) . . ? 
C7 C20 C19 106.2(4) . . ? 
C13 C20 C19 105.5(4) . . ? 
C7 C20 H16 112.9 . . ? 
C13 C20 H16 112.9 . . ? 
C19 C20 H16 112.9 . . ? 
C22 P1 C23 102.3(2) . . ? 
C22 P1 C21 103.0(3) . . ? 
C23 P1 C21 101.2(2) . . ? 
C22 P1 Pt1 116.43(18) . . ? 
C23 P1 Pt1 120.71(17) . . ? 
C21 P1 Pt1 110.83(18) . . ? 
P1 C21 H17 109.5 . . ? 
P1 C21 H18 109.5 . . ? 
H17 C21 H18 109.5 . . ? 
P1 C21 H19 109.5 . . ? 
H17 C21 H19 109.5 . . ? 
H18 C21 H19 109.5 . . ? 
P1 C22 H20 109.5 . . ? 
P1 C22 H21 109.5 . . ? 
H20 C22 H21 109.5 . . ? 
P1 C22 H22 109.5 . . ? 
H20 C22 H22 109.5 . . ? 
H21 C22 H22 109.5 . . ? 
P1 C23 H23 109.5 . . ? 
P1 C23 H24 109.5 . . ? 
H23 C23 H24 109.5 . . ? 
P1 C23 H25 109.5 . . ? 
H23 C23 H25 109.5 . . ? 
H24 C23 H25 109.5 . . ? 
C30 P2 C36 105.9(2) . . ? 
C30 P2 C24 103.0(2) . . ? 
C36 P2 C24 100.3(2) . . ? 
C30 P2 Pt1 111.00(15) . . ? 
C36 P2 Pt1 118.83(15) . . ? 
C24 P2 Pt1 116.08(15) . . ? 
C29 C24 C25 118.3(4) . . ? 
C29 C24 P2 121.0(3) . . ? 
C25 C24 P2 120.7(4) . . ? 
C26 C25 C24 120.3(5) . . ? 
C26 C25 H26 119.8 . . ? 
C24 C25 H26 119.8 . . ? 
C25 C26 C27 120.5(5) . . ? 
C25 C26 H27 119.7 . . ? 
C27 C26 H27 119.7 . . ? 
C26 C27 C28 119.7(4) . . ? 
C26 C27 H28 120.2 . . ? 
C28 C27 H28 120.2 . . ? 
C27 C28 C29 119.7(5) . . ? 
C27 C28 H29 120.1 . . ? 
C29 C28 H29 120.1 . . ? 
C24 C29 C28 121.4(5) . . ? 
C24 C29 H30 119.3 . . ? 
C28 C29 H30 119.3 . . ? 
C35 C30 C31 117.6(4) . . ? 
C35 C30 P2 119.2(4) . . ? 
C31 C30 P2 123.2(4) . . ? 
C32 C31 C30 121.5(4) . . ? 
C32 C31 H31 119.3 . . ? 
C30 C31 H31 119.3 . . ? 
C31 C32 C33 119.7(5) . . ? 
C31 C32 H32 120.2 . . ? 
C33 C32 H32 120.2 . . ? 
C32 C33 C34 120.1(5) . . ? 
C32 C33 H33 119.9 . . ? 
C34 C33 H33 119.9 . . ? 
C35 C34 C33 119.6(5) . . ? 
C35 C34 H34 120.2 . . ? 
C33 C34 H34 120.2 . . ? 
C30 C35 C34 121.6(5) . . ? 
C30 C35 H35 119.2 . . ? 
C34 C35 H35 119.2 . . ? 
C41 C36 C37 118.9(4) . . ? 
C41 C36 P2 123.9(4) . . ? 
C37 C36 P2 117.1(4) . . ? 
C38 C37 C36 120.8(5) . . ? 
C38 C37 H36 119.6 . . ? 
C36 C37 H36 119.6 . . ? 
C37 C38 C39 120.2(5) . . ? 
C37 C38 H37 119.9 . . ? 
C39 C38 H37 119.9 . . ? 
C40 C39 C38 119.1(5) . . ? 
C40 C39 H38 120.5 . . ? 
C38 C39 H38 120.5 . . ? 
C39 C40 C41 120.4(5) . . ? 
C39 C40 H39 119.8 . . ? 
C41 C40 H39 119.8 . . ? 
C36 C41 C40 120.6(5) . . ? 
C36 C41 H40 119.7 . . ? 
C40 C41 H40 119.7 . . ? 
Cl2 C42 Cl1 113.7(4) . . ? 
Cl2 C42 H41 108.8 . . ? 
Cl1 C42 H41 108.8 . . ? 
Cl2 C42 H42 108.8 . . ? 
Cl1 C42 H42 108.8 . . ? 
H41 C42 H42 107.7 . . ? 
 
_diffrn_measured_fraction_theta_max    0.999 
_diffrn_reflns_theta_full              25.50 
_diffrn_measured_fraction_theta_full   0.999 
_refine_diff_density_max    2.337 
_refine_diff_density_min   -1.633 
_refine_diff_density_rms    0.121 
